# Supplementary material for: The barley leaf rust resistance gene Rph3 encodes a putative executor protein
Source: Research Square preprint supplement (doi:10.21203/rs.3.rs-729002/v1), 2021-07-30
Supplement: Supplementary file 1 [file cb8080c98d2a1cdf2e1087c0.xlsx]

## Sheet: Table S1
Table S1. The predominance of P. hordei pathotype virulent for the Rph3 gene in Australia
Year	Number of isolates	Number isolates virulent for Rph3	Frequency (%) of virulence for Rph3
2009	96	6	6.3
2010	172	42	24.4
2011	65	3	4.6
2012	25	0	0
2013	53	20	37.7
2014	48	23	47.9
2015	55	31	56.4
2016	116	112	96.6
2017	198	160	80.8
2018	20	16	80
2019	10	9	90

## Sheet: Table S2
Table S2. Marker genotype of recombinant inbred lines bred from the cross cvs. Tallon x Scarlett used for constructing the basic map of Rph3
Order	RIL ID	Population	MLOC_001	MLOC_003	MLOC_005	MLOC_004	Rph3	MLOC_023	MLOC_036	MLOC_038	MLOC_039	MLOC_040	MLOC_007	MLOC_008	MLOC_010	MLOC_020
1	5	Tallon/ScarlTT RILS	Allele 2	Allele 2	Allele 2	Allele 2	Allele 2	Allele 2	Allele 2	Allele 2	-	Allele 2	Allele 2	Allele 2	Allele 2	Allele 2
2	7	Tallon/ScarlTT RILS	Allele 1	Allele 1	Allele 1	Allele 1	Allele 1	Allele 1	Allele 1	Allele 1	Allele 1	Allele 1	Allele 1	Allele 1	Allele 1	Allele 2
3	9	Tallon/ScarlTT RILS	Allele 2	Allele 1	Allele 1	Allele 1	Allele 1	Allele 1	Allele 1	Allele 1	Allele 1	Allele 1	Allele 1	Allele 1	Allele 1	Allele 2
4	12	Tallon/ScarlTT RILS	Allele 1	Allele 1	Allele 1	Allele 1	Allele 1	Allele 1	Allele 1	Allele 1	Allele 1	Allele 1	Allele 1	Allele 1	Allele 1	Allele 1
5	13	Tallon/ScarlTT RILS	Allele 2	Allele 2	Allele 2	Allele 2	Allele 2	Allele 2	Allele 2	Allele 2	Allele 2	Allele 2	Allele 2	Allele 2	Allele 2	Allele 2
6	14	Tallon/ScarlTT RILS	Allele 1	Allele 1	Allele 1	Allele 1	Allele 1	Allele 1	Allele 1	Allele 1	Allele 1	Allele 1	Allele 1	Allele 1	Allele 1	Allele 1
7	15	Tallon/ScarlTT RILS	Allele 1	Allele 1	Allele 1	Allele 1	Allele 1	Allele 1	Allele 1	Allele 1	Allele 1	Allele 1	Allele 1	Allele 1	Allele 1	Allele 1
8	16	Tallon/ScarlTT RILS	Allele 1	Allele 1	Allele 1	Allele 1	Allele 1	Allele 1	Allele 1	Allele 1	Allele 1	Allele 1	Allele 1	Allele 1	Allele 1	Allele 1
9	17	Tallon/ScarlTT RILS	Allele 2	Allele 2	Allele 2	Allele 2	Allele 2	Allele 2	Allele 2	Allele 2	-	Allele 2	Allele 2	Allele 2	Allele 2	Allele 2
10	18	Tallon/ScarlTT RILS	Allele 2	Allele 2	Allele 2	Allele 2	Allele 2	Allele 2	Allele 2	Allele 2	Allele 2	Allele 2	Allele 2	Allele 2	Allele 2	Allele 2
11	19	Tallon/ScarlTT RILS	Allele 1	Allele 1	Allele 1	Allele 1	Allele 1	Allele 1	Allele 1	Allele 1	Allele 1	Allele 1	Allele 1	Allele 1	Allele 1	Allele 1
12	20	Tallon/ScarlTT RILS	Allele 1	Allele 1	Allele 1	Allele 1	Allele 1	Allele 1	Allele 1	Allele 1	Allele 1	Allele 1	Allele 1	Allele 1	Allele 1	Allele 2
13	21	Tallon/ScarlTT RILS	Allele 1	Allele 1	Allele 1	Allele 1	Allele 1	Allele 1	Allele 1	Allele 1	Allele 1	Allele 1	-	Allele 2	Allele 2	Allele 2
14	22	Tallon/ScarlTT RILS	Allele 1	Allele 1	Allele 1	Allele 1	Allele 1	Allele 1	Allele 1	Allele 1	Allele 1	Allele 1	Allele 1	Allele 1	Allele 1	Allele 1
15	24	Tallon/ScarlTT RILS	Allele 1	Allele 1	Allele 1	Allele 1	Allele 1	Allele 1	Allele 1	Allele 1	Allele 1	Allele 1	Allele 1	Allele 1	Allele 1	Allele 2
16	25	Tallon/ScarlTT RILS	Allele 2	Allele 2	Allele 2	Allele 2	Allele 2	Allele 2	Allele 2	Allele 2	Allele 2	Allele 2	Allele 2	Allele 2	Allele 1	Allele 1
17	26	Tallon/ScarlTT RILS	Allele 2	Allele 2	Allele 2	Allele 2	Allele 2	Allele 2	Allele 2	Allele 2	Allele 2	Allele 2	Allele 2	Allele 2	Allele 2	Allele 2
18	27	Tallon/ScarlTT RILS	Allele 1	Allele 1	Allele 1	Allele 1	Allele 1	Allele 1	Allele 1	Allele 1	Allele 1	Allele 1	Allele 1	Allele 1	Allele 1	Allele 1
19	28	Tallon/ScarlTT RILS	Allele 2	Allele 2	Allele 2	Allele 2	Allele 2	Allele 2	Allele 2	Allele 2	Allele 2	Allele 1	Allele 1	Allele 1	Allele 1	Allele 1
20	29	Tallon/ScarlTT RILS	Allele 1	Allele 1	Allele 1	Allele 1	Allele 1	Allele 1	Allele 1	Allele 1	Allele 1	Allele 1	Allele 1	Allele 1	Allele 1	Allele 1
21	32	Tallon/ScarlTT RILS	Allele 2	Allele 2	Allele 2	Allele 2	Allele 2	Allele 2	Allele 2	Allele 2	Allele 2	Allele 2	Allele 2	Allele 2	Allele 2	Allele 2
22	36	Tallon/ScarlTT RILS	Allele 1	Allele 1	Allele 1	Allele 1	Allele 1	Allele 1	Allele 1	Allele 1	Allele 1	Allele 1	Allele 1	Allele 1	Allele 1	Allele 1
23	41	Tallon/ScarlTT RILS	Allele 1	Allele 1	Allele 1	Allele 1	Allele 1	Allele 1	Allele 1	Allele 1	Allele 1	Allele 1	Allele 1	Allele 1	Allele 1	Allele 1
24	43	Tallon/ScarlTT RILS	Allele 2	Allele 2	Allele 2	Allele 2	Allele 2	Allele 2	Allele 2	Allele 2	Allele 2	Allele 2	Allele 2	Allele 2	Allele 1	Allele 1
25	44	Tallon/ScarlTT RILS	Allele 2	Allele 2	Allele 2	Allele 2	Allele 2	Allele 2	Allele 2	Allele 2	Allele 2	Allele 1	Allele 1	Allele 1	Allele 1	Allele 2
26	45	Tallon/ScarlTT RILS	Allele 2	Allele 2	Allele 2	Allele 2	Allele 2	Allele 2	Allele 2	Allele 2	Allele 2	Allele 2	Allele 2	Allele 2	Allele 2	Allele 2
27	46	Tallon/ScarlTT RILS	Allele 1	Allele 1	Allele 1	Allele 1	Allele 1	Allele 1	Allele 1	Allele 1	Allele 1	Allele 1	Allele 1	Allele 1	Allele 1	Allele 1
28	47	Tallon/ScarlTT RILS	Allele 2	Allele 2	Allele 2	Allele 2	Allele 2	Allele 2	Allele 2	Allele 2	Allele 2	Allele 2	Allele 2	Allele 2	Allele 2	Allele 2
29	50	Tallon/ScarlTT RILS	Allele 2	Allele 2	Allele 2	Allele 2	Allele 2	Allele 2	Allele 2	Allele 2	Allele 2	Allele 2	Allele 2	Allele 2	Allele 2	Allele 2
30	52	Tallon/ScarlTT RILS	Allele 2	Allele 2	Allele 2	Allele 2	Allele 2	Allele 2	Allele 2	Allele 2	Allele 2	Allele 2	Allele 2	Allele 2	Allele 2	Allele 1
31	53	Tallon/ScarlTT RILS	Allele 2	-	Heterozygous	Heterozygous	Allele 2	Heterozygous	Heterozygous	Heterozygous	Heterozygous	Heterozygous	Heterozygous	Heterozygous	Heterozygous	Allele 2
32	54	Tallon/ScarlTT RILS	-	Allele 1	Allele 1	Allele 1	Allele 1	Allele 1	Allele 1	Allele 1	Allele 1	Allele 1	Allele 1	Allele 1	Allele 1	Allele 1
33	55	Tallon/ScarlTT RILS	Allele 1	Allele 1	Allele 1	Allele 1	Allele 1	Allele 1	Allele 1	Allele 1	Allele 1	Allele 1	Allele 1	Allele 1	Allele 1	Allele 1
34	56	Tallon/ScarlTT RILS	Allele 1	Allele 1	Allele 1	Allele 1	Allele 1	Allele 1	Allele 1	Allele 1	Allele 1	Allele 1	Allele 1	Allele 1	Allele 1	Allele 1
35	57	Tallon/ScarlTT RILS	Allele 1	Allele 1	Allele 2	Allele 2	Allele 2	Allele 2	Allele 2	Allele 2	Allele 2	Allele 2	Allele 2	Allele 2	Allele 2	Allele 2
36	58	Tallon/ScarlTT RILS	Allele 1	Allele 1	Allele 1	Allele 1	Allele 1	Allele 1	Allele 1	Allele 1	Allele 1	Allele 1	Allele 1	Allele 1	Allele 2	Allele 2
37	61	Tallon/ScarlTT RILS	Allele 1	Allele 1	Allele 1	Allele 1	Allele 1	Allele 1	Allele 1	Allele 1	Allele 1	Allele 1	Allele 1	Allele 1	Allele 2	Allele 1
38	63	Tallon/ScarlTT RILS	Allele 2	Allele 2	Allele 2	Allele 2	Allele 2	Allele 2	Allele 2	Allele 2	Allele 2	Allele 2	Allele 2	Allele 2	Allele 2	Allele 2
39	66	Tallon/ScarlTT RILS	Allele 1	Allele 1	Allele 1	Allele 1	Allele 1	Allele 1	Allele 1	Allele 1	Allele 1	Allele 1	Allele 1	Allele 1	Allele 1	Allele 1
40	69	Tallon/ScarlTT RILS	Allele 2	Allele 2	Allele 2	Allele 2	Allele 2	Allele 2	Allele 2	Allele 2	Allele 2	Allele 2	Allele 2	Allele 2	Allele 2	Allele 2
41	70	Tallon/ScarlTT RILS	Allele 2	Allele 2	Allele 2	Allele 2	Allele 2	Allele 2	Allele 2	Allele 2	Allele 2	Allele 1	Allele 1	Allele 1	Allele 1	Allele 1
42	71	Tallon/ScarlTT RILS	Allele 1	Allele 1	Allele 1	Allele 1	Allele 1	Allele 1	Allele 1	Allele 1	Allele 1	Allele 1	Allele 1	Allele 1	Allele 1	Allele 2
43	72	Tallon/ScarlTT RILS	Allele 2	Allele 2	Allele 2	Allele 2	Allele 2	Allele 2	Allele 2	Allele 2	Allele 2	Allele 2	Allele 2	Allele 2	Allele 2	Allele 2
44	74	Tallon/ScarlTT RILS	Allele 1	Allele 1	Allele 1	Allele 1	Allele 1	Allele 1	Allele 1	Allele 1	Allele 1	Allele 1	Allele 1	Allele 1	Allele 1	Allele 1
45	77	Tallon/ScarlTT RILS	Allele 1	Allele 1	Allele 1	Allele 1	Allele 1	Allele 1	Allele 1	Allele 1	Allele 1	Allele 1	Allele 1	Allele 1	Allele 1	Allele 2
46	79	Tallon/ScarlTT RILS	Allele 1	Allele 1	Allele 1	Allele 1	Allele 1	Allele 1	Allele 1	Allele 1	Allele 1	Allele 1	Allele 1	Allele 1	Allele 1	Allele 1
47	80	Tallon/ScarlTT RILS	Allele 1	Allele 1	Allele 1	Allele 1	Allele 1	Allele 1	Allele 1	Allele 1	Allele 1	Allele 1	Allele 1	Allele 2	Allele 2	Allele 2
48	82	Tallon/ScarlTT RILS	Allele 2	Allele 2	Allele 2	Allele 2	Allele 2	Allele 2	Allele 2	Allele 2	Allele 2	Allele 2	Allele 2	Allele 2	Allele 1	Allele 1
49	84	Tallon/ScarlTT RILS	Allele 2	Allele 2	Allele 2	Allele 2	Allele 2	Allele 2	Allele 2	Allele 2	Allele 2	Allele 2	Allele 2	Allele 2	Allele 2	Allele 2
50	85	Tallon/ScarlTT RILS	Allele 1	Allele 1	Allele 1	Allele 1	Allele 1	Allele 1	Allele 1	Allele 1	Allele 1	Allele 1	Allele 1	Allele 1	Allele 1	Allele 2
51	87	Tallon/ScarlTT RILS	Allele 2	Allele 2	Allele 2	Allele 2	Allele 2	Allele 2	Allele 2	Allele 2	Allele 2	Allele 2	Allele 2	Allele 2	Allele 2	Allele 1
52	88	Tallon/ScarlTT RILS	Allele 2	Allele 2	Allele 2	Allele 2	Allele 2	Allele 2	Allele 2	Allele 2	Allele 2	Allele 2	Allele 2	Allele 2	Allele 2	Allele 1
53	90	Tallon/ScarlTT RILS	Allele 2	Allele 2	Allele 2	Allele 2	Allele 2	Allele 2	Allele 2	Allele 2	Allele 2	Allele 2	Allele 2	Allele 2	Allele 2	Allele 1
54	92	Tallon/ScarlTT RILS	Allele 2	Allele 2	Allele 2	Allele 2	Allele 2	Allele 2	Allele 2	Allele 2	-	Allele 2	Allele 2	Allele 2	Allele 2	Allele 2
55	93	Tallon/ScarlTT RILS	Allele 1	Allele 1	Allele 1	Allele 1	Allele 1	Allele 1	Allele 1	Allele 1	Allele 1	Allele 1	Allele 1	Allele 1	Allele 1	Allele 1
56	95	Tallon/ScarlTT RILS	Allele 2	Allele 2	Allele 2	Allele 2	Allele 2	Allele 2	Allele 2	Allele 2	Allele 2	Allele 2	Allele 2	Allele 2	Allele 2	Allele 2
57	97	Tallon/ScarlTT RILS	Allele 2	Allele 2	Allele 2	Allele 2	Allele 2	Allele 2	Allele 2	Allele 2	Allele 2	Allele 2	Allele 2	Allele 2	Allele 2	Allele 2
58	100	Tallon/ScarlTT RILS	Allele 1	Allele 1	Allele 1	Allele 1	Allele 1	Allele 1	Allele 1	Allele 1	Allele 1	Allele 1	Allele 1	Allele 1	Allele 1	Allele 1
59	103	Tallon/ScarlTT RILS	Allele 2	Allele 2	Allele 2	Allele 2	Allele 2	Allele 2	Allele 2	Allele 2	Allele 2	Allele 2	Allele 2	Allele 2	Allele 2	Allele 1
60	104	Tallon/ScarlTT RILS	Allele 1	Allele 1	Allele 1	Allele 1	Allele 1	Allele 1	Allele 1	Allele 1	Allele 1	Allele 1	Allele 1	Allele 1	Allele 1	Allele 2
61	105	Tallon/ScarlTT RILS	Allele 2	Allele 1	Allele 1	Allele 1	Allele 1	Allele 1	Allele 1	Allele 1	Allele 1	Allele 1	Allele 1	Allele 1	Allele 1	Allele 1
62	106	Tallon/ScarlTT RILS	Allele 1	Allele 1	Allele 1	Allele 1	Allele 1	Allele 1	Allele 1	Allele 1	Allele 1	Allele 1	Allele 1	Allele 1	Allele 1	Allele 2
63	107	Tallon/ScarlTT RILS	Allele 1	Allele 1	Allele 1	Allele 1	Allele 1	Allele 1	Allele 1	Allele 1	-	Allele 1	Allele 1	Allele 1	Allele 1	Allele 1
64	114	Tallon/ScarlTT RILS	Allele 1	Allele 1	Allele 1	Allele 1	Allele 1	Allele 1	Allele 1	Allele 1	Allele 1	Allele 1	Allele 1	Allele 1	Allele 1	Allele 1
65	116	Tallon/ScarlTT RILS	Allele 1	Allele 2	Allele 2	Allele 2	Allele 2	Allele 2	Allele 2	Allele 2	Allele 2	Allele 2	Allele 2	Allele 2	Allele 2	Allele 1
66	117	Tallon/ScarlTT RILS	Allele 2	Allele 2	Allele 2	Allele 2	Allele 2	Allele 2	Allele 2	Allele 2	Allele 2	Allele 2	Allele 2	Allele 2	Allele 2	Allele 1
67	119	Tallon/ScarlTT RILS	Allele 2	Allele 2	Allele 2	Allele 2	Allele 2	Allele 2	Allele 2	Allele 2	Allele 2	Allele 2	Allele 2	Allele 2	Allele 2	Allele 2
68	120	Tallon/ScarlTT RILS	Allele 1	Allele 1	Allele 1	Allele 1	Allele 1	Allele 1	Allele 1	Allele 1	Allele 1	Allele 1	Allele 1	Allele 1	Allele 1	Allele 2
69	121	Tallon/ScarlTT RILS	Allele 1	Allele 1	Allele 1	Allele 1	Allele 1	Allele 1	Allele 1	Allele 1	Allele 1	Allele 1	Allele 1	Allele 1	Allele 1	Allele 2
70	123	Tallon/ScarlTT RILS	Allele 1	Allele 1	Allele 1	Allele 1	Allele 1	Allele 1	Allele 1	Allele 1	Allele 1	Allele 1	Allele 1	Allele 1	Allele 1	Allele 1
71	124	Tallon/ScarlTT RILS	Allele 1	Allele 1	Allele 1	Allele 1	Allele 1	Allele 1	Allele 1	Allele 1	Allele 1	Allele 1	Allele 1	Allele 1	Allele 1	Allele 1
72	125	Tallon/ScarlTT RILS	Allele 1	Allele 1	Allele 1	Allele 1	Allele 1	Allele 1	Allele 1	Allele 1	Allele 1	Allele 1	Allele 1	Allele 1	Allele 1	Allele 1
73	127	Tallon/ScarlTT RILS	Allele 2	Allele 2	Allele 2	Allele 2	Allele 2	Allele 2	Allele 2	Allele 2	Allele 2	Allele 2	Allele 2	Allele 2	Allele 2	Allele 2
74	128	Tallon/ScarlTT RILS	Allele 1	Allele 1	Allele 1	Allele 1	Allele 1	Allele 1	Allele 1	Allele 1	Allele 1	Allele 1	Allele 1	Allele 1	-	Allele 1
75	130	Tallon/ScarlTT RILS	Allele 2	Allele 2	Allele 2	Allele 2	Allele 2	Allele 2	Allele 2	Allele 2	Allele 2	Allele 2	Allele 2	Allele 2	Allele 2	Allele 1
76	132	Tallon/ScarlTT RILS	Allele 1	Allele 1	Allele 1	Allele 1	Allele 1	Allele 1	Allele 1	Allele 1	Allele 1	Allele 1	Allele 1	Allele 1	Allele 1	Allele 1
77	133	Tallon/ScarlTT RILS	Allele 1	Allele 1	Allele 1	Allele 1	Allele 1	Allele 1	Allele 1	Allele 1	Allele 1	Allele 1	Allele 1	Allele 1	Allele 1	Allele 1
78	134	Tallon/ScarlTT RILS	Allele 1	Allele 1	Allele 1	Allele 1	Allele 1	Allele 1	Allele 1	Allele 1	Allele 1	Allele 1	Allele 1	Allele 1	Allele 1	Allele 2
79	135	Tallon/ScarlTT RILS	Allele 1	Allele 1	Allele 1	Allele 1	Allele 1	Allele 1	Allele 1	Allele 1	Allele 1	Allele 1	Allele 1	Allele 1	Allele 1	Allele 1
80	136	Tallon/ScarlTT RILS	Allele 2	Allele 2	Allele 2	Allele 2	Allele 2	Allele 2	Allele 2	Allele 2	Allele 2	Allele 2	Allele 2	Allele 2	Allele 2	Allele 1
81	137	Tallon/ScarlTT RILS	Allele 1	Allele 1	Allele 1	Allele 1	Allele 1	Allele 1	Allele 1	Allele 1	Allele 1	Allele 1	Allele 1	Allele 1	Allele 1	Allele 2
82	139	Tallon/ScarlTT RILS	Allele 1	Allele 1	Allele 1	Allele 1	Allele 1	Allele 1	Allele 1	Allele 1	-	Allele 1	Allele 1	Allele 1	Allele 1	Allele 2
83	140	Tallon/ScarlTT RILS	Allele 2	Allele 2	Allele 2	Allele 2	Allele 2	Allele 2	Allele 2	Allele 2	Allele 2	Allele 2	Allele 2	Allele 2	Allele 1	Allele 1
84	141	Tallon/ScarlTT RILS	Allele 1	Allele 1	Allele 1	Allele 1	Allele 1	Allele 1	Allele 1	Allele 1	Allele 1	Allele 1	Allele 1	Allele 1	Allele 1	Allele 2
85	142	Tallon/ScarlTT RILS	Allele 2	Allele 2	Allele 2	Allele 2	Allele 2	Allele 2	Allele 2	Allele 2	Allele 2	Allele 2	Allele 2	Allele 2	Allele 2	Allele 2
86	143	Tallon/ScarlTT RILS	Allele 1	Allele 1	Allele 1	Allele 1	Allele 1	Allele 1	Allele 1	Allele 1	Allele 1	Allele 1	Allele 2	-	Allele 2	Allele 2
87	145	Tallon/ScarlTT RILS	Allele 2	Allele 2	Allele 2	Allele 2	Allele 2	Allele 2	Allele 2	Allele 2	Allele 2	Allele 2	Allele 2	Allele 2	Allele 2	Allele 2
88	146	Tallon/ScarlTT RILS	Allele 1	Allele 1	Allele 1	Allele 1	Allele 1	Allele 1	Allele 1	Allele 1	Allele 1	Allele 1	Allele 1	Allele 1	Allele 1	Allele 1
89	147	Tallon/ScarlTT RILS	Allele 2	Allele 2	Allele 2	Allele 2	Allele 2	Allele 2	Allele 2	Allele 2	Allele 2	Allele 2	Allele 2	Allele 1	Allele 1	Allele 1
90	148	Tallon/ScarlTT RILS	Allele 1	Allele 1	Allele 1	Allele 1	Allele 1	Allele 1	Allele 1	Allele 1	Allele 1	Allele 1	Allele 1	Allele 1	Allele 1	Allele 2
91	149	Tallon/ScarlTT RILS	Allele 2	Allele 2	Allele 2	Allele 2	Allele 2	Allele 2	Allele 2	Allele 2	Allele 2	Allele 2	Allele 2	Allele 2	Allele 2	Allele 2
92	151	Tallon/ScarlTT RILS	Allele 1	Allele 1	Allele 1	Allele 1	Allele 1	Allele 1	Allele 1	Allele 1	Allele 1	Allele 1	Allele 1	Allele 1	Allele 1	Allele 1
93	152	Tallon/ScarlTT RILS	Allele 2	Allele 2	Allele 2	Allele 2	Allele 2	Allele 2	Allele 2	Allele 2	Allele 2	Allele 2	Allele 2	Allele 2	Allele 2	Allele 2
94	153	Tallon/ScarlTT RILS	Allele 1	Allele 1	Allele 1	Allele 1	Allele 1	Allele 1	Allele 1	Allele 1	Allele 1	Allele 1	Allele 1	Allele 1	Allele 1	Allele 1
95	154	Tallon/ScarlTT RILS	-	Allele 2	Allele 2	Allele 2	Allele 2	Allele 2	Allele 2	Allele 2	Allele 2	Allele 2	Allele 2	Allele 2	-	Allele 2
96	155	Tallon/ScarlTT RILS	Allele 1	Allele 1	Allele 1	Allele 1	Allele 1	Allele 1	Allele 1	Allele 1	Allele 1	Allele 1	Allele 1	Allele 2	Allele 2	Allele 2
97	156	Tallon/ScarlTT RILS	Allele 1	Allele 1	Allele 1	Allele 1	Allele 1	Allele 1	Allele 1	Allele 1	Allele 1	Allele 1	Allele 1	-	Allele 2	Allele 2
98	157	Tallon/ScarlTT RILS	Allele 2	Allele 2	Allele 2	Allele 2	Allele 2	Allele 2	Allele 2	Allele 2	Allele 2	Allele 2	Allele 2	Allele 2	Allele 2	Allele 2
99	160	Tallon/ScarlTT RILS	Allele 1	Allele 1	Allele 1	Allele 1	Allele 1	Allele 1	Allele 1	Allele 1	Allele 1	Allele 1	Allele 1	Allele 2	Allele 2	Allele 2
100	161	Tallon/ScarlTT RILS	Allele 2	Allele 2	Allele 2	Allele 2	Allele 2	Allele 2	Allele 2	Allele 2	Allele 2	Allele 2	Allele 2	Allele 2	Allele 2	Allele 1
101	164	Tallon/ScarlTT RILS	-	Allele 1	Allele 1	Allele 1	Allele 1	Allele 1	Allele 1	Allele 1	Allele 1	Allele 1	Allele 1	Allele 1	Allele 1	Allele 1
102	165	Tallon/ScarlTT RILS	-	Allele 1	Allele 1	Allele 1	Allele 1	Allele 1	Allele 1	Allele 1	Allele 1	Allele 1	Allele 1	Allele 1	Allele 2	Allele 1
103	166	Tallon/ScarlTT RILS	Allele 2	Allele 2	Allele 2	Allele 2	Allele 2	Allele 2	Allele 2	Allele 2	Allele 2	Allele 2	Allele 2	Allele 2	Allele 1	Allele 1
104	167	Tallon/ScarlTT RILS	Allele 1	Allele 1	Allele 1	Allele 1	Allele 1	Allele 1	Allele 1	Allele 1	Allele 1	Allele 1	Allele 1	Allele 1	Allele 1	Allele 1
105	171	Tallon/ScarlTT RILS	Allele 1	Allele 1	Allele 1	Allele 1	Allele 1	Allele 1	Allele 1	Allele 1	Allele 1	Allele 1	Allele 1	Allele 1	Allele 1	Allele 1
106	173	Tallon/ScarlTT RILS	Allele 1	Allele 1	Allele 1	Allele 1	Allele 1	Allele 1	Allele 1	Allele 1	Allele 1	Allele 1	Allele 1	Allele 1	Allele 1	Allele 1
107	175	Tallon/ScarlTT RILS	Allele 2	Allele 2	Allele 2	Allele 2	Allele 2	Allele 2	Allele 2	Allele 2	Allele 2	Allele 2	Allele 2	Allele 2	Allele 2	Allele 2
108	176	Tallon/ScarlTT RILS	Allele 1	Allele 1	Allele 1	Allele 1	Allele 1	Allele 1	Allele 1	Allele 1	Allele 1	Allele 1	Allele 1	Allele 1	Allele 1	Allele 1
109	178	Tallon/ScarlTT RILS	Allele 1	Allele 1	Allele 1	Allele 1	Allele 1	Allele 1	Allele 1	Allele 1	Allele 1	Allele 1	Allele 1	Allele 1	Allele 1	Allele 2
110	179	Tallon/ScarlTT RILS	Allele 1	Allele 2	Allele 2	Allele 2	Allele 2	Allele 2	Allele 2	Allele 2	Allele 2	Allele 2	Allele 1	Allele 1	Allele 1	Allele 1
111	180	Tallon/ScarlTT RILS	Allele 1	Allele 1	Allele 1	Allele 1	Allele 1	Allele 1	Allele 1	Allele 1	Allele 1	Allele 1	Allele 1	Allele 1	Allele 1	Allele 2
112	181	Tallon/ScarlTT RILS	Allele 1	Allele 1	Allele 1	Allele 1	Allele 1	Allele 1	Allele 1	Allele 1	Allele 1	Allele 1	Allele 1	Allele 1	Allele 1	Allele 2
113	183	Tallon/ScarlTT RILS	Allele 1	Allele 1	Allele 1	Allele 1	Allele 1	Allele 1	Allele 1	Allele 1	Allele 1	Allele 1	Allele 1	Allele 1	Allele 1	Allele 2
114	184	Tallon/ScarlTT RILS	Allele 1	Allele 2	Allele 2	Allele 2	Allele 2	Allele 2	Allele 2	Allele 2	Allele 2	Allele 2	Allele 2	Allele 2	Allele 2	Allele 1
115	186	Tallon/ScarlTT RILS	Allele 1	Allele 1	Allele 1	Allele 1	Allele 1	Allele 1	Allele 1	Allele 1	Allele 1	Allele 1	Allele 1	Allele 1	Allele 1	Allele 1
116	187	Tallon/ScarlTT RILS	Heterozygous	Heterozygous	Heterozygous	Heterozygous	Allele 1	Heterozygous	Heterozygous	Heterozygous	Heterozygous	Heterozygous	Heterozygous	Heterozygous	Heterozygous	Allele 1
117	190	Tallon/ScarlTT RILS	Allele 1	Allele 1	Allele 1	Allele 1	Allele 1	Allele 1	Allele 1	Allele 1	Allele 1	Allele 1	Allele 1	Allele 1	Allele 1	Allele 1
118	191	Tallon/ScarlTT RILS	Allele 1	Allele 1	Allele 1	Allele 1	Allele 1	Allele 1	Allele 1	Allele 1	Allele 1	Allele 1	Allele 1	Allele 1	Allele 1	Allele 1
119	192	Tallon/ScarlTT RILS	Allele 1	Allele 1	Allele 1	Allele 1	Allele 1	Allele 1	Allele 1	Allele 1	Allele 1	Allele 1	Allele 1	Allele 1	Allele 1	Allele 1
120	193	Tallon/ScarlTT RILS	Allele 2	Allele 2	Allele 2	Allele 2	Allele 2	Allele 2	Allele 2	Allele 2	Allele 2	Allele 2	Allele 2	Allele 2	Allele 2	Allele 2
121	194	Tallon/ScarlTT RILS	Allele 1	Allele 1	Allele 1	Allele 1	Allele 1	Allele 1	Allele 1	Allele 1	Allele 1	Allele 1	Allele 1	Allele 1	Allele 1	Allele 2
122	196	Tallon/ScarlTT RILS	Allele 2	Allele 2	Allele 2	Allele 2	Allele 2	Allele 2	Allele 2	Allele 2	Allele 2	Allele 2	Allele 2	Allele 2	Allele 2	Allele 1
123	198	Tallon/ScarlTT RILS	Allele 2	Allele 1	Allele 1	Allele 1	Allele 1	Allele 1	Allele 1	Allele 1	Allele 1	Allele 1	Allele 1	-	Allele 1	Allele 1
124	200	Tallon/ScarlTT RILS	Allele 1	Allele 1	Allele 1	Allele 1	Allele 1	Allele 1	Allele 1	Allele 1	Allele 1	Allele 1	Allele 1	Allele 1	Allele 1	Allele 2
125	201	Tallon/ScarlTT RILS	Allele 1	Allele 1	Allele 1	Allele 1	Allele 1	Allele 1	Allele 1	Allele 1	Allele 1	Allele 1	Allele 1	Allele 1	Allele 1	Allele 1
126	203	Tallon/ScarlTT RILS	Allele 1	Allele 1	Allele 1	Allele 1	Allele 1	Allele 1	Allele 1	Allele 1	Allele 1	Allele 1	Allele 1	Allele 1	Allele 1	Allele 1
127	204	Tallon/ScarlTT RILS	Allele 2	Allele 2	Allele 2	Allele 2	Allele 2	Allele 2	Allele 2	Allele 2	Allele 2	Allele 2	Allele 2	Allele 2	Allele 2	Allele 2
128	205	Tallon/ScarlTT RILS	Allele 2	Allele 2	Allele 2	Allele 2	Allele 2	Allele 2	Allele 2	Allele 2	Allele 2	Allele 1	Allele 1	Allele 1	Allele 1	Allele 1
129	207	Tallon/ScarlTT RILS	Allele 1	Allele 1	Allele 2	Allele 2	Allele 2	Allele 2	Allele 2	Allele 2	Allele 2	Allele 2	Allele 2	Allele 2	Allele 2	Allele 2
130	208	Tallon/ScarlTT RILS	Allele 2	Allele 2	Allele 2	Allele 2	Allele 2	Allele 2	Allele 2	Allele 2	Allele 2	Allele 2	Allele 2	Allele 1	Allele 1	Allele 1
131	212	Tallon/ScarlTT RILS	Allele 1	Allele 1	Allele 1	Allele 1	Allele 1	Allele 1	Allele 1	Allele 1	Allele 1	Allele 1	Allele 1	Allele 1	Allele 1	Allele 1
132	214	Tallon/ScarlTT RILS	Allele 2	Allele 2	Allele 2	Allele 2	Allele 2	Allele 2	Allele 2	Allele 2	Allele 2	Allele 2	Allele 2	Allele 2	Allele 2	Allele 2
133	215	Tallon/ScarlTT RILS	Allele 1	Allele 1	Allele 1	Allele 1	Allele 1	Allele 1	Allele 1	Allele 1	Allele 1	Allele 1	Allele 1	Allele 1	Allele 1	Allele 2
134	216	Tallon/ScarlTT RILS	Allele 1	Allele 1	Allele 1	Allele 1	Allele 1	Allele 1	Allele 1	Allele 1	Allele 1	Allele 1	Allele 1	Allele 1	Allele 1	Allele 1
135	217	Tallon/ScarlTT RILS	Allele 1	Allele 1	Allele 1	Allele 1	Allele 1	Allele 1	Allele 1	Allele 1	Allele 1	Allele 1	Allele 1	Allele 1	Allele 1	Allele 2
136	218	Tallon/ScarlTT RILS	Allele 2	Allele 2	Allele 2	Allele 2	Allele 2	Allele 2	Allele 2	Allele 2	Allele 2	Allele 2	Allele 2	Allele 2	Allele 2	Allele 2
137	219	Tallon/ScarlTT RILS	Allele 2	Allele 2	Allele 2	Allele 2	Allele 2	Allele 2	Allele 2	Allele 2	Allele 2	Allele 2	Allele 2	Allele 2	Allele 2	Allele 2
138	220	Tallon/ScarlTT RILS	Allele 1	Allele 1	Allele 1	Allele 1	Allele 1	Allele 1	Heterozygous	Heterozygous	Heterozygous	Heterozygous	Heterozygous	Heterozygous	Heterozygous	Allele 2
139	222	Tallon/ScarlTT RILS	Allele 1	Allele 1	Allele 1	Allele 1	Allele 1	Allele 1	Allele 1	Allele 1	Allele 1	Allele 1	Allele 1	Allele 1	Allele 2	Allele 2
140	223	Tallon/ScarlTT RILS	Allele 1	Allele 1	Allele 1	Allele 1	Allele 1	Allele 1	Allele 1	Allele 1	Allele 1	Allele 1	Allele 1	Allele 1	Allele 2	Allele 2
141	224	Tallon/ScarlTT RILS	Allele 2	Allele 1	Allele 1	Allele 1	Allele 1	Allele 1	Allele 1	Allele 1	Allele 1	Allele 1	Allele 1	Allele 1	Allele 1	Allele 1
142	226	Tallon/ScarlTT RILS	Allele 1	Allele 1	Allele 1	Allele 1	Allele 1	Allele 1	Allele 1	Allele 1	Allele 1	Allele 1	Allele 1	Allele 1	Allele 1	Allele 2
143	227	Tallon/ScarlTT RILS	Allele 2	Allele 2	Allele 2	Allele 2	Allele 2	Allele 2	Allele 2	Allele 2	Allele 2	Allele 2	Allele 2	Allele 2	Allele 2	Allele 2
144	228	Tallon/ScarlTT RILS	Allele 1	Allele 1	Allele 1	Allele 1	Allele 1	Allele 1	Allele 1	Allele 1	Allele 1	Allele 1	Allele 1	Allele 1	Allele 1	Allele 1
145	229	Tallon/ScarlTT RILS	Allele 1	Allele 1	Allele 1	Allele 1	Allele 1	Allele 1	Allele 1	Allele 1	Allele 1	Allele 1	Allele 1	Allele 1	Allele 1	Allele 1
146	233	Tallon/ScarlTT RILS	Allele 2	Allele 2	Allele 2	Allele 2	Allele 2	Allele 2	Allele 2	Allele 2	Allele 2	Allele 2	Allele 2	Allele 2	Allele 2	Allele 1
147	235	Tallon/ScarlTT RILS	Allele 1	Allele 1	Heterozygous	Heterozygous	Allele 1	Heterozygous	Heterozygous	Heterozygous	Heterozygous	Heterozygous	Heterozygous	Heterozygous	Heterozygous	Allele 1
148	236	Tallon/ScarlTT RILS	Allele 2	Allele 2	Allele 1	Allele 1	Allele 1	Allele 1	Allele 1	Allele 1	Allele 1	Allele 1	Allele 1	Allele 1	Allele 1	Allele 1
149	237	Tallon/ScarlTT RILS	Allele 1	Allele 2	Allele 2	Allele 2	Allele 2	Allele 2	Allele 2	Allele 2	Allele 2	Allele 2	Allele 2	Allele 2	Allele 2	Allele 2
150	238	Tallon/ScarlTT RILS	Allele 2	Allele 2	Allele 2	Allele 2	Allele 2	Allele 2	Allele 2	Allele 2	Allele 2	Allele 2	Allele 2	Allele 2	Allele 2	Allele 2
151	239	Tallon/ScarlTT RILS	Allele 1	Allele 1	Allele 1	Allele 1	Allele 1	Allele 1	Allele 1	Allele 1	Allele 1	Allele 1	Allele 1	Allele 1	Allele 1	Allele 1
152	240	Tallon/ScarlTT RILS	Allele 1	Allele 1	Allele 1	Allele 1	Allele 1	Allele 1	Allele 1	Allele 1	Allele 1	Allele 1	Allele 1	Allele 1	Allele 1	Allele 1
153	246	Tallon/ScarlTT RILS	Allele 1	Allele 1	Allele 1	Allele 1	Allele 1	Allele 1	Allele 1	Allele 1	Allele 1	Allele 1	Allele 1	Allele 1	Allele 1	Allele 2
154	248	Tallon/ScarlTT RILS	Allele 1	Allele 1	Heterozygous	Heterozygous	Allele 2	Heterozygous	Heterozygous	Heterozygous	Heterozygous	Heterozygous	Heterozygous	Heterozygous	Heterozygous	Allele 2
155	249	Tallon/ScarlTT RILS	Allele 1	Allele 1	Allele 1	Allele 1	Allele 1	Allele 1	Allele 1	Allele 1	Allele 1	Allele 1	Allele 1	Allele 1	Allele 1	Allele 1
156	250	Tallon/ScarlTT RILS	Allele 2	Allele 2	Allele 2	Allele 2	Allele 2	Allele 2	Allele 2	Allele 2	Allele 2	Allele 2	Allele 2	Allele 2	Allele 2	Allele 2
157	254	Tallon/ScarlTT RILS	Allele 2	Allele 2	Allele 2	Allele 2	Allele 2	Allele 2	Allele 2	Allele 2	Allele 2	Allele 2	Allele 2	Allele 2	Allele 2	Allele 2
158	255	Tallon/ScarlTT RILS	Heterozygous	Allele 2	Allele 2	Allele 2	Allele 2	Allele 2	Allele 2	Allele 2	Allele 2	Allele 2	Allele 2	Allele 2	Allele 1	Allele 1
159	256	Tallon/ScarlTT RILS	Allele 2	Allele 2	Allele 2	Allele 2	Allele 2	Allele 2	Allele 2	Allele 2	Allele 2	Allele 2	Allele 2	Allele 2	Allele 2	Allele 2
160	257	Tallon/ScarlTT RILS	Allele 2	Allele 2	Allele 2	Allele 2	Allele 2	Allele 2	Allele 2	Allele 2	Allele 2	Allele 2	Allele 2	Allele 2	Allele 2	Allele 2
161	258	Tallon/ScarlTT RILS	Allele 2	Allele 2	Allele 2	Allele 2	Allele 2	Allele 2	Allele 2	Allele 2	Allele 2	Allele 2	Allele 2	Allele 2	Allele 2	Allele 2
162	266	Tallon/ScarlTT RILS	Allele 2	Allele 2	Allele 2	Allele 2	Allele 2	Allele 2	Allele 2	Allele 2	Allele 2	Allele 2	Allele 2	Allele 2	Allele 2	Allele 1
163	267	Tallon/ScarlTT RILS	Allele 1	Allele 1	Allele 1	Allele 1	Allele 1	Allele 1	Allele 1	Allele 1	Allele 1	Allele 1	Allele 1	Allele 1	Allele 2	Allele 1
164	268	Tallon/ScarlTT RILS	Allele 2	Allele 2	Allele 2	Allele 2	Allele 2	Allele 2	Allele 2	Allele 2	Allele 2	Allele 2	Allele 2	Allele 2	Allele 2	Allele 1
165	269	Tallon/ScarlTT RILS	Allele 2	Allele 2	Allele 2	Allele 2	Allele 2	Allele 2	Allele 2	Allele 2	Allele 2	Allele 2	Allele 2	Allele 2	Allele 2	Allele 2
166	270	Tallon/ScarlTT RILS	Allele 2	Allele 2	Allele 2	Allele 2	Allele 2	Allele 2	Allele 2	Allele 2	Allele 2	Allele 2	Allele 2	Allele 2	Allele 2	Allele 1
167	274	Tallon/ScarlTT RILS	Allele 2	Allele 2	Allele 2	Allele 2	Allele 2	Allele 2	Allele 2	Allele 2	Allele 2	Allele 2	Allele 2	Allele 2	Allele 2	Allele 1
168	275	Tallon/ScarlTT RILS	Allele 1	Allele 1	Allele 1	Allele 1	Allele 1	Allele 1	Allele 1	Allele 1	Allele 1	Allele 1	Allele 1	Allele 1	Allele 1	Allele 1
169	276	Tallon/ScarlTT RILS	Allele 1	Allele 1	Allele 1	Allele 1	Allele 1	Allele 1	Allele 1	Allele 1	Allele 1	Allele 1	Allele 1	Allele 1	Allele 2	Allele 2
170	278	Tallon/ScarlTT RILS	Allele 2	Allele 2	Allele 2	Allele 1	Allele 1	Allele 1	Allele 1	Allele 1	Allele 1	Allele 1	Allele 1	Allele 1	Allele 1	Allele 2
171	279	Tallon/ScarlTT RILS	Allele 1	Allele 1	Allele 1	Allele 1	Allele 1	Allele 1	Allele 1	Allele 1	Allele 1	Allele 1	Heterozygous	Heterozygous	Allele 1	Allele 2
172	280	Tallon/ScarlTT RILS	Allele 2	Allele 2	Allele 2	Allele 2	Allele 2	Allele 2	Allele 2	Allele 2	Allele 2	Allele 2	Allele 2	-	Allele 2	Allele 2
173	283	Tallon/ScarlTT RILS	Allele 1	Allele 1	Allele 1	Allele 1	Allele 1	Allele 1	Allele 1	Allele 1	Allele 1	Allele 1	Allele 1	Allele 1	Allele 1	Allele 1
174	284	Tallon/ScarlTT RILS	Allele 1	Allele 1	Allele 1	Allele 1	Allele 1	Allele 1	Allele 1	Allele 1	Allele 1	Allele 1	Allele 1	Allele 1	Allele 1	Allele 1
175	286	Tallon/ScarlTT RILS	Allele 1	Allele 1	Allele 2	Allele 2	Allele 2	Allele 2	Allele 2	Allele 2	Allele 2	Allele 2	Allele 2	Allele 2	Allele 2	Allele 1
176	288	Tallon/ScarlTT RILS	Allele 1	Allele 1	Allele 1	Allele 1	Allele 1	Allele 1	Allele 1	Allele 1	Allele 1	Allele 1	Allele 1	Allele 1	Allele 1	Allele 1
177	290	Tallon/ScarlTT RILS	Allele 1	Allele 2	Allele 2	Allele 2	Allele 2	Allele 2	Allele 2	Allele 2	Allele 2	Allele 2	Allele 1	Allele 1	Allele 1	Allele 1
178	293	Tallon/ScarlTT RILS	Allele 1	Allele 2	Allele 2	Allele 2	Allele 2	Allele 2	Allele 2	Allele 2	Allele 2	Allele 2	Allele 2	Allele 2	Allele 2	Allele 2
179	295	Tallon/ScarlTT RILS	Allele 2	Allele 1	Allele 1	Allele 1	Allele 1	Allele 1	Allele 1	Allele 1	Allele 1	Allele 1	Allele 1	Allele 1	Allele 1	Allele 2
180	296	Tallon/ScarlTT RILS	Allele 1	Allele 1	Allele 1	Allele 1	Allele 1	Allele 1	Allele 1	Allele 1	Allele 1	Allele 1	Allele 1	Allele 1	Allele 1	Allele 1
181	299	Tallon/ScarlTT RILS	Allele 2	Allele 2	Allele 2	Allele 2	Allele 2	Allele 2	Allele 2	Allele 2	Allele 2	Allele 2	Allele 2	Allele 2	Allele 2	Allele 1
182	300	Tallon/ScarlTT RILS	Allele 1	Allele 1	Allele 1	Allele 1	Allele 1	Allele 1	Allele 1	Allele 1	Allele 1	Allele 1	Allele 1	Allele 1	Allele 1	Allele 2
	Tallon	Susceptible parent	Allele 2	Allele 2	Allele 2	Allele 2	Allele 2	Allele 2	Allele 2	Allele 2	Allele 2	Allele 2	Allele 2	Allele 2	Allele 2	Allele 2
	Scarlett	Resistant parent	Allele 1	Allele 1	Allele 1	Allele 1	Allele 1	Allele 1	Allele 1	Allele 1	Allele 1	Allele 1	Allele 1	Allele 1	Allele 1	Allele 1

## Sheet: Table S3
Table S3. Pedigrees and gene postulation of the barley materials used in the construction of genetic map, mutant population, and the complementation test
Cultivar	Synonym/identifier	Rph3 Genotype	Other Rph genes	Pedigree	Response to P. hordei pathotype						Used for
					200 P- [=518]	5453 P+ [=584]	5457 P+ [=612]	220 P+ 13+ [=577]	253 P- [=490]	4610 P+ [=507]
Alexis	PI 564487	Rph3	Nil	Breun1622/Triumph	;cn	;1+cn	3+	;12n	;1n	;12n	Crossing
Barke	HOR 13170	Rph3	Nil	Libelle/Alexis	0;n	;1cn	3+	0;=	0;n	0;	Physical mapping
BW746	BW746	Rph3	Nil	Bowman*11//Estate/3.2 uz als	0;n	;1-cn	3+	;c	;cn	;c	Crossing and mutating
Henley	-	Rph3	Nil	Cellar/NSL97-554	;cn	;1+cn	3+	0;	;cn	;c	Mutating
Scarlett	3880-I	Rph3	Nil	Amazone/Breun-2730-E//KYM	;+cn	;1cn	3+	0;=	;n	0;	Crossing
Volla	PI 321852	Rph3	Nil	Breuns Wisa/Heines Haisa 1	0;	;1cn	33+	0;=n	;n	0;-	Crossing
Bowman	PI483237	rph3	Nil	ND2685/ND1156//Hector	33+	3+	3+	3+	3+	3+	Crossing
Flagship	WI3408	rph3	Nil	Chieftan/Barque//Manley/VB9104	3+	33+c	3+	3+	3+	3+	Crossing
Golden Promise	Line 759/4	rph3	Nil	gamma-ray induced semi-dwarf mutant of the cultivar ‘Maythorpe’	33+	3+	3+	33+	3+	33+	Gene transforming
Gus	PI 494521	rph3	Nil	Selection from Composite Cross XXXII-76	3+	3+	3+	3+	3+	3+	Crossing
Sloop	WI2875-22	rph3	Rph19	RL1577/84/Schooner	1+2+c	3+	3+	3+	;1n	3+	Crossing
Tallon	PI 573731	rph3	Rph12	Triumph/Grimmett	;1=n	3+	3+	;+n	;1+n	3+	Crossing

## Sheet: Table S4
Table S4. The mapping populations used for high-resolution mapping of the Rph3 locus
Female (allele)	Male (allele)	Generation	No. plants	No. gametes	No. recombinant plants b
Tallon (rph3)	Scarlett (Rph3)	F2	4100	8200	22
Sloop (rph3)	Alexis (Rph3)	F2	4553	9106	15
Volla (Rph3)	Gus (rph3)	F2	466	932	5
Volla (Rph3)	Flagship (rph3)	F2	645	1290	1
Bowman (rph3)	BW746(Rph3) a	F2	553	1106	2
BW746(Rph3) a	Gus (rph3)	F2	94	188	0
Total			10411	20822	45
a The near-isogenic line of the cultivar Bowman carrying the Rph3.c allele from the landrace Estate
b The recombinations were between markers MLOC_004 and MLOC_023

## Sheet: Table S5
Table S5. DNA markers used to construct the high-resolution map of the Rph3 locus
Marker name	Gene ID	Forward primer	Reverse primer	Type of marker	Annealing temperature	Extension time (sec)	Size (bp)	Restriction enzyme	Incubate temperature°C	Electro- phoresis	Morex reference Marker start	Morex reference Marker end	Chromosomal Location
MLOC_004	H7P612196113	GGAACTTTCCTGACCACCAA	AAGGGCTTAAATGGAGAAACAA	ALP	60	30	179	N/A	N/A	Metaphor 4%	612196113	612196292	7HL
MLOC_005	HORVU7Hr1G111360	GTTTACCTGGTTGCCCTGAA	GAGCATTATTAGCCCGCGTA	CAPS	58	30	715	BsrI	65	Agarose 2%	611953527	611952813	7HL
MLOC_023	HORVU7Hr1G111700	CTGGTGGCACCGGTACTAAT	AATCCACTGCATCCTTCCAG	ALP	60	30	157	N/A	N/A	Metaphor 4%	612912046	612912203	7HL
MLOC_040	HORVU7Hr1G112840	CTGGTGATGCGAGTGAAAGA	CACTGTTGTGGCCATTCAAC	CAPS	60	30	837	BstBI	65	Agarose 2%	614118169	614119005	7HL
MLOC_150	HORVU7Hr1G111470	TGGCATCTCCCTTCTTCTGT	CGAGAAGGACCTGTTCAAGC	CAPS	60	30	810	HinfI	37	Agarose 2%	612250970	612251780	7HL
MLOC_154	HORVU7Hr1G111530	TGAGCTTGAACCATCACCTG	AAAGAAAGGAAGCGCACGTA	CAPS	55	30	843	BsrBI	37	Agarose 2%	612302807	612303650	7HL
MLOC_161	HORVU7Hr1G111660	GTGGGAGGTTGGGTTGTATG	GGTCCATCAATTCCGACAAG	ALP	60	30	686	N/A	N/A	Agarose 2%	612689078	612689764	7HL
MLOC_184	HORVU7Hr1G111560	GGGTTGGCACTTGCTGTAAT	CTGCTCCAGATTTTCCGAAG	CAPS	60	30	844	HpaII	37	Agarose 2%	612358631	612359475	7HL
MLOC_190	HORVU7Hr1G111570	AAACGTTTGTGTTTTCTGTCCA	CGTGTCTGACTCGCTCCATA	CAPS	60	30	738	DdeI	37	Agarose 2%	612420065	612421343	7HL
MLOC_198	HORVU7Hr1G111600	GCTGAGCCCCTAATACACGA	CCCATGTATGTGCTCGTTTG	CAPS	55	30	870	BsrI	65	Agarose 2%	612518564	612519434	7HL
MLOC_214	HORVU7Hr1G111650	CAGGACAGCAGGGATCTAGG	AAATGGGTCAAGCTTGTTGG	CAPS	55	30	519	HhaI	37	Agarose 2%	612733001	612733520	7HL
MLOC_239	H7P612679828	AGAAAAGATCTGCCGTGCAT	GTCGAGCAGTGTGGAGATGA	CAPS	60	30	900	DdeI	37	Agarose 2%	612679828	612680728	7HL
MLOC_389	HORVU7Hr1G111600	CTCTTGCTCTCGGCTCTGAC	TCAATGCGAGGAACTCAACA	CAPS	60	30	473	DraI	37	Agarose 2%	612519113	612519586	7HL
MLOC_400 a	N/A	ACGTGAATGAAATCCGGTTC	GTGCTGCTCTCCGTTGTGT	ALP	63	30	202	N/A	N/A	Agarose 2%	N/A	N/A	7HL
a The diagnosis marker generates the band only when the Rph3 gene is present

## Sheet: Table S6
Table S6. Marker genotype of critical homozygote recombinants in the vicinity of the resistance gene Rph3 for constructing the high-resolution map
Plant ID	Population	MLOC_005	MLOC_004	MLOC_150	MLOC_154	MLOC_184	MLOC_190	MLOC_198	Rph3	MLOC_389	MLOC_239	MLOC_161	MLOC_214	MLOC_023	MLOC_040
15858	Sloop x Alexis	Allele 2	Allele 2	Allele 2	Allele 1	Allele 1	Allele 1	Allele 1	Allele 1	Allele 1	Allele 1	Allele 1	Allele 1	Allele 1	Allele 1
16988	Tallon x Scarlett	Allele 1	Allele 1	Allele 1	Allele 1	Allele 1	Allele 1	Allele 1	Allele 1	Allele 1	Allele 1	Allele 1	Allele 1	Allele 2	Allele 2
17345	Tallon x Scarlett	Allele 2	Allele 2	Allele 2	Allele 2	Allele 2	Allele 2	Allele 2	Allele 2	Allele 2	Allele 1	Allele 1	Allele 1	Allele 1	Allele 1
17403	Tallon x Scarlett	Allele 1	Allele 1	Allele 1	Allele 1	Allele 1	Allele 1	Allele 1	Allele 1	Allele 1	Allele 1	Allele 1	Allele 1	Allele 2	Allele 2
17447	Tallon x Scarlett	Allele 1	Allele 1	Allele 1	Allele 1	Allele 1	Allele 1	Allele 1	Allele 1	Allele 1	Allele 2	Allele 2	Allele 2	Allele 2	Allele 2
17722	Sloop x Alexis	Allele 1	Allele 1	Allele 1	Allele 1	Allele 1	Allele 1	Allele 1	Allele 1	Allele 1	Allele 1	Allele 1	Allele 1	Allele 2	Allele 2
18147	Sloop x Alexis	Allele 2	Allele 2	Allele 2	Allele 2	Allele 2	Allele 2	Allele 2	Allele 2	Allele 2	Allele 1	Allele 1	Allele 1	Allele 1	Allele 1
18254	Sloop x Alexis	Allele 1	Allele 1	Allele 1	Allele 1	Allele 1	Allele 1	Allele 1	Allele 1	Allele 1	Allele 2	Allele 2	Allele 2	Allele 2	Allele 2
18487	Sloop x Alexis	Allele 1	Allele 1	Allele 1	Allele 2	Allele 2	Allele 2	Allele 2	Allele 2	Allele 2	Allele 2	Allele 2	Allele 2	Allele 2	Allele 2
18819	Sloop x Alexis	Allele 2	Allele 2	Allele 2	Allele 2	Allele 2	Allele 2	Allele 2	Allele 2	Allele 2	Allele 1	Allele 1	Allele 1	Allele 1	Allele 1
18963	Sloop x Alexis	Allele 1	Allele 1	Allele 1	Allele 1	Allele 1	Allele 1	Allele 1	Allele 1	Allele 2	Allele 2	Allele 2	Allele 2	Allele 2	Allele 2
19550	Volla x Gus	Allele 2	Allele 2	Allele 2	Allele 1	Allele 1	Allele 1	Allele 1	Allele 1	Allele 1	Allele 1	Allele 1	Allele 1	Allele 1	Allele 1
19644	Volla x Gus	Allele 1	Allele 1	Allele 1	Allele 2	Allele 2	Allele 2	Allele 2	Allele 2	Allele 2	Allele 2	Allele 2	Allele 2	Allele 2	Allele 2
19730	Volla x Gus	Allele 1	Allele 1	Allele 1	Allele 2	Allele 2	Allele 2	Allele 2	Allele 2	Allele 2	Allele 2	Allele 2	Allele 2	Allele 2	Allele 2
20018	Volla x Gus	Allele 1	Allele 1	Allele 1	Allele 1	Allele 2	Allele 2	Allele 2	Allele 2	Allele 2	Allele 2	Allele 2	Allele 2	Allele 2	Allele 2
20085	Volla x Gus	Allele 2	Allele 2	Allele 2	Allele 2	Allele 2	Allele 2	Allele 2	Allele 2	Allele 2	-	Allele 2	Allele 2	Allele 1	Allele 1
20372	Volla x Flagship	Allele 2	Allele 2	Allele 2	Allele 2	Allele 2	Allele 2	Allele 2	Allele 2	Allele 2	Allele 2	Allele 2	Allele 2	Allele 1	Allele 1
21026	Bowman x BW746 a	Allele 1	Allele 1	Allele 1	Allele 1	Allele 1	Allele 1	Allele 1	Allele 1	Allele 1	Allele 2	Allele 2	Allele 2	Allele 2	Allele 2
21658	Bowman x BW746 a	Allele 2	Allele 2	Allele 2	Allele 2	Allele 2	Allele 2	Allele 1	Allele 1	Allele 1	Allele 1	Allele 1	Allele 1	Allele 1	Allele 1
22662	Tallon x Scarlett	Allele 1	Allele 1	Allele 1	Allele 1	Allele 1	Allele 1	Allele 1	Allele 1	Allele 1	Allele 1	Allele 2	Allele 2	Allele 2	Allele 2
22809	Tallon x Scarlett	Allele 2	Allele 2	Allele 2	Allele 2	Allele 2	Allele 2	Allele 2	Allele 2	Allele 2	Heterozygous	Allele 2	Allele 1	Allele 1	Allele 1
23729	Tallon x Scarlett	Allele 2	Allele 2	Allele 2	Allele 2	Allele 2	Allele 2	Allele 2	Allele 2	Allele 2	Allele 1	Allele 1	Allele 1	Allele 1	Allele 1
23794	Tallon x Scarlett	Allele 2	Allele 2	Allele 2	Allele 2	Allele 2	Allele 2	Allele 2	Allele 2	Allele 2	Allele 2	Allele 2	Allele 2	Allele 1	Allele 1
24055	Tallon x Scarlett	Allele 1	Allele 1	Allele 1	Allele 1	Allele 1	Allele 1	Allele 1	Allele 1	Allele 1	Allele 1	Allele 1	Allele 1	Allele 2	Allele 2
24262	Tallon x Scarlett	Allele 2	Allele 2	Allele 2	Allele 2	Allele 2	Allele 2	Allele 2	Allele 2	Allele 1	Allele 1	Allele 1	Allele 1	Allele 1	Allele 1
24559	Tallon x Scarlett	Allele 2	Allele 2	Allele 2	Allele 1	Allele 1	Allele 1	Allele 1	Allele 1	Allele 1	Allele 1	Allele 1	Allele 1	Allele 1	Allele 1
24574	Tallon x Scarlett	Allele 1	Allele 1	Allele 1	Allele 2	Allele 2	Allele 2	Allele 2	Allele 2	Allele 2	Allele 2	Allele 2	Allele 2	Allele 2	Allele 2
24614	Tallon x Scarlett	Allele 1	Allele 1	Allele 1	Allele 2	Allele 2	Allele 2	Allele 2	Allele 2	Allele 2	Allele 2	Allele 2	Allele 2	Allele 2	Allele 2
24780	Tallon x Scarlett	Allele 1	Allele 1	Allele 1	Allele 1	Allele 1	Allele 1	Allele 1	Allele 1	Allele 2	Allele 2	Allele 2	Allele 2	Allele 2	Allele 2
24972	Tallon x Scarlett	Allele 1	Allele 1	Allele 2	Allele 2	Allele 2	Allele 2	Allele 2	Allele 2	Allele 2	Allele 2	Allele 2	Allele 2	Allele 2	Allele 2
25155	Tallon x Scarlett	Allele 2	Allele 2	Allele 2	Allele 2	Allele 2	Allele 2	Allele 2	Allele 2	Allele 2	Heterozygous	Allele 2	Allele 1	Allele 1	Allele 1
25260	Tallon x Scarlett	Allele 1	Allele 1	Allele 1	Allele 1	Allele 1	Allele 2	Allele 2	Allele 2	Allele 2	Allele 2	Allele 2	Allele 2	Allele 2	Allele 2
25368	Tallon x Scarlett	Allele 2	Allele 2	Allele 2	Allele 1	Allele 1	Allele 1	Allele 1	Allele 1	Allele 1	Allele 1	Allele 1	Allele 1	Allele 1	Allele 1
25422	Tallon x Scarlett	Allele 2	Allele 2	Allele 2	Allele 2	Allele 2	Allele 2	Allele 2	Allele 2	Allele 2	Allele 2	Allele 2	Allele 2	Allele 1	Allele 1
25429	Tallon x Scarlett	Allele 1	Allele 1	Allele 1	Allele 2	Allele 2	Allele 2	Allele 2	Allele 2	Allele 2	Allele 2	Allele 2	Allele 2	Allele 2	Allele 2
25566	Tallon x Scarlett	Allele 2	Allele 2	Allele 2	Allele 2	Allele 2	Allele 2	Allele 1	Allele 1	Allele 1	Allele 1	Allele 1	Allele 1	Allele 1	Allele 1
25669	Tallon x Scarlett	Allele 2	Allele 2	Allele 1	Allele 1	Allele 1	Allele 1	Allele 1	Allele 1	Allele 1	Allele 1	Allele 1	Allele 1	Allele 1	Allele 1
26206	Sloop x Alexis	Allele 2	Allele 2	Allele 2	Allele 2	Allele 2	Allele 2	Allele 2	Allele 2	Allele 2	Allele 1	Allele 1	Allele 1	Allele 1	Allele 1
27190	Sloop x Alexis	Allele 2	Allele 2	Allele 2	Allele 2	Allele 2	Allele 2	Allele 2	Allele 2	Allele 2	Allele 1	Allele 1	Allele 1	Allele 1	Allele 1
27222	Sloop x Alexis	Allele 2	Allele 2	Allele 1	Allele 1	Allele 1	Allele 1	Allele 1	Allele 1	Allele 1	Allele 1	Allele 1	Allele 1	Allele 1	Allele 1
28429	Sloop x Alexis	Allele 2	Allele 2	Allele 2	Allele 1	Allele 1	Allele 1	Allele 1	Allele 1	Allele 1	Allele 1	Allele 1	Allele 1	Allele 1	Allele 1
29636	Sloop x Alexis	Allele 2	Allele 2	Allele 2	Allele 2	Allele 2	Allele 1	Allele 1	Allele 1	Allele 1	Allele 1	Allele 1	Allele 1	Allele 1	Allele 1
28913	Sloop x Alexis	Allele 2	Allele 2	Allele 2	Allele 1	Allele 1	Allele 1	Allele 1	Allele 1	Allele 1	Allele 1	Allele 1	Allele 1	Allele 1	Allele 1
29155	Sloop x Alexis	Allele 2	Allele 2	Allele 2	Allele 2	Allele 2	Allele 1	Allele 1	Allele 1	Allele 1	Allele 1	Allele 1	Allele 1	Allele 1	Allele 1
29488	Sloop x Alexis	Allele 1	Allele 1	Allele 2	Allele 2	Allele 2	Allele 2	Allele 2	Allele 2	Allele 2	Allele 2	Allele 2	-	Allele 2	Allele 2
Tallon	Susceptible parent	Allele 2	Allele 2	Allele 2	Allele 2	Allele 2	Allele 2	Allele 2	Allele 2	Allele 2	Allele 2	Allele 2	Allele 2	Allele 2	Allele 2
Scarlett	Resistant parent	Allele 1	Allele 1	Allele 1	Allele 1	Allele 1	Allele 1	Allele 1	Allele 1	Allele 1	Allele 1	Allele 1	Allele 1	Allele 1	Allele 1
a The near-isogenic line of the cultivar Bowman carrying the Rph3.c allele from the landrace Estate

## Sheet: Table S7
Table S7. Description of EMS induced mutants in the Rph3 locus
Mutant lines	Origin	Mutant position	Nucleotide change	Amino acid change	Site of mutation (Exon/Intron number)	Infection type c	Fetility status	Observation on development
M167	BW746 a	1907	C > T	Leu93Phe	Exon 2	33-	Partially fertile	Well developed, healthy seeds
M181	BW746 a	3057	C > T	Pro126Leu	Exon 3	2+	Partially fertile	Well developed, healthy seeds
M466	BW746 a	1593	G > A	frameshift mutant	Intron 1	3+	Partially fertile	Very stunted, abortive seeds
M198	Henley	1844	G > T	Glu > Stop codon	Exon 2	33+	Partially fertile	Well developed, healthy seeds
M177	BW746 a	None	None	None	Ni b	22+c	Partially fertile	well developed, pale green leaves, abortive seeds
M188	BW746 a	None	None	None	NI b	22+c	Partially fertile	Well developed, healthy seeds
a The near-isogenic line of the cultivar Bowman carrying the Rph3.c allele from the landrace Estate
b No Information
c Inoculated with P. hordei pathotype 5453P+. The scoring is “0”-“4” known as infection types (IT), conveying variation from complete immunity (0) to a fully susceptible response (4). The letters c and n are included to indicate greater than normal chlorosis or necrosis, respectively. The symbols − is added to indicate infection types that is lower than normal, and + to indicate infection types h…

## Sheet: Table S8
Table S8. Barley induced mutants selected for Rph3 using forward genetics
Parent 1 a	Parent 2 a	Type of cross	Response to pathotype 5453P+ c			Allelic status
			Parent 1	Parent 2	F1
M167	M181	(I) x (I)	33-	2+	22+c	Allelic
M167	M188	(I) x (II)	33-	22+c	;1+c	Not allelic
M177	M188	(II) x (II)	22+c	22+c	;1+c	Not allelic
BW746 b			;1-cn
Bowman			3+
a All the parents used for crossing were derived from BW746
b The near-isogenic line of the cultivar Bowman carrying the Rph3.c allele from the landrace Estate
c The scoring is “0”-“4” known as infection types (IT), conveying variation from complete immunity (0) to a fully susceptible response (4). The letters c and n are included to indicate greater than normal chlorosis or necrosis, respectively. The symbols − is added to indicate infection types that is lower than normal, and + to indicate infection types higher than normal.
Group (I) consists of known mutants and group (II) consists of altered phenotype mutants without changes in the Rph3 sequence

## Sheet: Table S9
Table S9. Progeny test of Rph3 transgenic plants in barley
Accessions	No. of seedlings	Phenotype (resistance : susceptible)	Genotype of MLOC_400 (Rph3 : rph3)	inconsitency
Estate	12	12 : 0	12 : 0	0/12
BW746	12	12 : 0	12 : 0	0/12
Bowman	10	0 : 10	0 : 10	0/10
Golden Promise	10	0 : 10	0 : 10	0/10
BG_925_E02	10	7 : 3	7 : 3	0/10
BG_925_E04	11	0 : 11	4 : 7	4/11
BG_925_E06	9	6 : 3	6 : 3	0/9
BG_925_E08	12	12 : 0	12 : 0	0/12
BG_925_E10	12	9 : 3	9 : 3	0/12
BG_925_E12	11	0 : 11	0 : 11	0/11
BG_925_E13	10	1 : 9	1 : 9	0/10
BG_925_E15	12	10 : 2	12 : 0	2/12
BG_925_E17	12	0 : 12	0 : 12	0/12
BG_925_E18	10	8 : 2	8 : 2	0/10
BG_925_E19	12	11 : 1	11 : 1	0/12
BG_925_E20	12	0 : 12	0 : 12	0/12
BG_925_E21	13	11 : 2	11 : 2	0/13
BG_925_E22	10	3 : 7	3 : 7	0/10
BG_925_E23	12	9 : 3	9 : 3	0/12
BG_925_E24	11	11 : 0	11 : 0	0/11
BG_925_E25	12	5 : 7	5 : 7	0/12
BG_925_E26	11	5 : 6	5 : 6	0/11
BG_925_E27	10	1 : 9	1 : 9	0/10
BG_925_E28	9	7 : 2	7 : 2	0/9

## Sheet: Table S10
Table S10. The differential expressed genes identified in BW746 challenged with Rph3-avirulent pathotype of P. hordei at two days post-inoculation
Response to P. hordei	GO Classes	Term	Term Identifier	p-value (adj)	-log10(p-value (adj))	Term size	Query size	Intersection	Effective domain size	Intersections
Up-regulated	GO:MF	catalytic activity, acting on a protein	GO:0140096	0.036029	1.44335	3350	883	175	21992	HORVU5HR1G012190.1,HORVU0HR1G014650.2,HORVU5HR1G087440.2,HORVU4HR1G082100.2,HORVU6HR1G004700.1,HORVU2HR1G044890.2,HORVU2HR1G121290.2,HORVU3HR1G025810.1,HORVU1HR1G087050.1,HORVU2HR1G108690.1,HORVU2HR1G113080.3,HORVU4HR1G043960.1,HORVU3HR1G099550.1,HORVU0HR1G006150.2,HORVU7HR1G024940.8,HORVU6HR1G067480.1,HORVU7HR1G030580.1,HORVU7HR1G050240.1,HORVU7HR1G010320.19,HORVU1HR1G005090.2,HORVU5HR1G084860.1…
Up-regulated	GO:BP	vesicle-mediated transport	GO:0016192	8.39629e-25	24.0759	450	825	79	19520	HORVU2HR1G116970.2,HORVU7HR1G030080.3,HORVU4HR1G022950.11,HORVU3HR1G070240.2,HORVU3HR1G094660.2,HORVU3HR1G073850.1,HORVU0HR1G010890.1,HORVU1HR1G057490.4,HORVU2HR1G123350.18,HORVU5HR1G026120.1,HORVU5HR1G028810.1,HORVU5HR1G048010.1,HORVU4HR1G027600.1,HORVU4HR1G016640.2,HORVU6HR1G083220.5,HORVU4HR1G088390.1,HORVU4HR1G019290.2,HORVU7HR1G054550.1,HORVU3HR1G000490.3,HORVU5HR1G033310.1,HORVU6HR1G043390.…
Up-regulated	GO:BP	nitrogen compound transport	GO:0071705	2.26897e-15	14.6442	1106	825	112	19520	HORVU6HR1G067980.1,HORVU3HR1G105870.5,HORVU3HR1G087690.1,HORVU3HR1G105890.2,HORVU2HR1G102720.2,HORVU2HR1G020450.1,HORVU2HR1G116970.2,HORVU2HR1G111140.3,HORVU2HR1G001790.10,HORVU6HR1G053710.1,HORVU7HR1G030080.3,HORVU1HR1G070730.2,HORVU1HR1G024550.1,HORVU3HR1G091120.3,HORVU4HR1G022950.11,HORVU3HR1G070240.2,HORVU5HR1G061580.4,HORVU3HR1G094660.2,HORVU3HR1G073850.1,HORVU7HR1G055570.11,HORVU0HR1G010890…
Up-regulated	GO:BP	macromolecule localization	GO:0033036	2.86328e-15	14.5431	929	825	100	19520	HORVU2HR1G020450.1,HORVU2HR1G116970.2,HORVU7HR1G024360.2,HORVU2HR1G001790.10,HORVU7HR1G030080.3,HORVU1HR1G024550.1,HORVU4HR1G022950.11,HORVU3HR1G070240.2,HORVU5HR1G061580.4,HORVU3HR1G094660.2,HORVU3HR1G073850.1,HORVU3HR1G110430.26,HORVU7HR1G055570.11,HORVU1HR1G046400.1,HORVU0HR1G010890.1,HORVU2HR1G046740.9,HORVU4HR1G088060.4,HORVU2HR1G123350.18,HORVU5HR1G026120.1,HORVU2HR1G002480.5,HORVU7HR1G0500…
Up-regulated	GO:BP	Golgi vesicle transport	GO:0048193	3.02228e-15	14.5197	191	825	41	19520	HORVU4HR1G022950.11,HORVU0HR1G010890.1,HORVU1HR1G057490.4,HORVU5HR1G028810.1,HORVU4HR1G027600.1,HORVU4HR1G016640.2,HORVU4HR1G088390.1,HORVU7HR1G054550.1,HORVU3HR1G000490.3,HORVU5HR1G084390.4,HORVU1HR1G061430.2,HORVU6HR1G087920.7,HORVU4HR1G050960.2,HORVU5HR1G025740.13,HORVU2HR1G073110.11,HORVU7HR1G001370.2,HORVU1HR1G069840.12,HORVU5HR1G039540.1,HORVU4HR1G041690.8,HORVU3HR1G092790.1,HORVU7HR1G02705…
Up-regulated	GO:BP	amide transport	GO:0042886	4.36611e-15	14.3599	804	825	91	19520	HORVU6HR1G067980.1,HORVU2HR1G102720.2,HORVU2HR1G020450.1,HORVU2HR1G116970.2,HORVU2HR1G001790.10,HORVU7HR1G030080.3,HORVU1HR1G024550.1,HORVU4HR1G022950.11,HORVU3HR1G070240.2,HORVU5HR1G061580.4,HORVU3HR1G094660.2,HORVU3HR1G073850.1,HORVU7HR1G055570.11,HORVU0HR1G010890.1,HORVU2HR1G123350.18,HORVU5HR1G026120.1,HORVU2HR1G002480.5,HORVU7HR1G050000.4,HORVU1HR1G034400.6,HORVU6HR1G067430.2,HORVU3HR1G08885…
Up-regulated	GO:BP	protein transport	GO:0015031	5.21153e-15	14.283	694	825	83	19520	HORVU2HR1G020450.1,HORVU2HR1G116970.2,HORVU2HR1G001790.10,HORVU7HR1G030080.3,HORVU1HR1G024550.1,HORVU4HR1G022950.11,HORVU3HR1G070240.2,HORVU5HR1G061580.4,HORVU3HR1G094660.2,HORVU3HR1G073850.1,HORVU7HR1G055570.11,HORVU0HR1G010890.1,HORVU2HR1G123350.18,HORVU5HR1G026120.1,HORVU2HR1G002480.5,HORVU7HR1G050000.4,HORVU1HR1G034400.6,HORVU5HR1G028810.1,HORVU5HR1G048010.1,HORVU5HR1G099670.11,HORVU3HR1G0610…
Up-regulated	GO:BP	establishment of protein localization	GO:0045184	8.79336e-15	14.0558	700	825	83	19520	HORVU2HR1G020450.1,HORVU2HR1G116970.2,HORVU2HR1G001790.10,HORVU7HR1G030080.3,HORVU1HR1G024550.1,HORVU4HR1G022950.11,HORVU3HR1G070240.2,HORVU5HR1G061580.4,HORVU3HR1G094660.2,HORVU3HR1G073850.1,HORVU7HR1G055570.11,HORVU0HR1G010890.1,HORVU2HR1G123350.18,HORVU5HR1G026120.1,HORVU2HR1G002480.5,HORVU7HR1G050000.4,HORVU1HR1G034400.6,HORVU5HR1G028810.1,HORVU5HR1G048010.1,HORVU5HR1G099670.11,HORVU3HR1G0610…
Up-regulated	GO:BP	protein localization	GO:0008104	1.03618e-14	13.9846	772	825	88	19520	HORVU2HR1G020450.1,HORVU2HR1G116970.2,HORVU2HR1G001790.10,HORVU7HR1G030080.3,HORVU1HR1G024550.1,HORVU4HR1G022950.11,HORVU3HR1G070240.2,HORVU5HR1G061580.4,HORVU3HR1G094660.2,HORVU3HR1G073850.1,HORVU7HR1G055570.11,HORVU0HR1G010890.1,HORVU2HR1G123350.18,HORVU5HR1G026120.1,HORVU2HR1G002480.5,HORVU7HR1G050000.4,HORVU1HR1G034400.6,HORVU7HR1G048810.1,HORVU5HR1G028810.1,HORVU5HR1G048010.1,HORVU5HR1G09967…
Up-regulated	GO:BP	peptide transport	GO:0015833	1.64799e-14	13.783	792	825	89	19520	HORVU6HR1G067980.1,HORVU2HR1G102720.2,HORVU2HR1G020450.1,HORVU2HR1G116970.2,HORVU2HR1G001790.10,HORVU7HR1G030080.3,HORVU1HR1G024550.1,HORVU4HR1G022950.11,HORVU3HR1G070240.2,HORVU5HR1G061580.4,HORVU3HR1G094660.2,HORVU3HR1G073850.1,HORVU7HR1G055570.11,HORVU0HR1G010890.1,HORVU2HR1G123350.18,HORVU5HR1G026120.1,HORVU2HR1G002480.5,HORVU7HR1G050000.4,HORVU1HR1G034400.6,HORVU6HR1G067430.2,HORVU3HR1G08885…
Up-regulated	GO:BP	organic substance transport	GO:0071702	5.21792e-14	13.2825	1313	825	122	19520	HORVU1HR1G010210.2,HORVU6HR1G067980.1,HORVU3HR1G105870.5,HORVU3HR1G105890.2,HORVU2HR1G102720.2,HORVU2HR1G020450.1,HORVU0HR1G016830.1,HORVU2HR1G116970.2,HORVU7HR1G024360.2,HORVU2HR1G111140.3,HORVU2HR1G001790.10,HORVU7HR1G030080.3,HORVU1HR1G024550.1,HORVU3HR1G091120.3,HORVU4HR1G022950.11,HORVU3HR1G070240.2,HORVU5HR1G061580.4,HORVU3HR1G094660.2,HORVU3HR1G073850.1,HORVU7HR1G055570.11,HORVU7HR1G031650…
Up-regulated	GO:BP	cellular localization	GO:0051641	8.39728e-12	11.0759	877	825	89	19520	HORVU2HR1G001790.10,HORVU4HR1G022950.11,HORVU3HR1G070240.2,HORVU7HR1G055570.11,HORVU0HR1G010890.1,HORVU2HR1G046740.9,HORVU5HR1G026120.1,HORVU7HR1G050000.4,HORVU1HR1G062330.8,HORVU1HR1G034400.6,HORVU7HR1G048810.1,HORVU5HR1G028810.1,HORVU5HR1G048010.1,HORVU5HR1G099670.11,HORVU4HR1G027600.1,HORVU3HR1G061000.5,HORVU4HR1G016640.2,HORVU6HR1G083220.5,HORVU4HR1G088390.1,HORVU7HR1G054550.1,HORVU3HR1G00049…
Up-regulated	GO:BP	intracellular transport	GO:0046907	9.56055e-12	11.0195	730	825	79	19520	HORVU2HR1G001790.10,HORVU4HR1G022950.11,HORVU3HR1G070240.2,HORVU7HR1G055570.11,HORVU0HR1G010890.1,HORVU5HR1G026120.1,HORVU7HR1G050000.4,HORVU1HR1G034400.6,HORVU5HR1G028810.1,HORVU5HR1G048010.1,HORVU5HR1G099670.11,HORVU4HR1G027600.1,HORVU3HR1G061000.5,HORVU4HR1G016640.2,HORVU6HR1G083220.5,HORVU4HR1G088390.1,HORVU7HR1G054550.1,HORVU5HR1G033310.1,HORVU6HR1G043390.18,HORVU5HR1G084390.4,HORVU1HR1G0614…
Up-regulated	GO:BP	endoplasmic reticulum to Golgi vesicle-mediated transport	GO:0006888	1.13815e-11	10.9438	104	825	27	19520	HORVU0HR1G010890.1,HORVU5HR1G028810.1,HORVU4HR1G027600.1,HORVU4HR1G016640.2,HORVU4HR1G088390.1,HORVU7HR1G054550.1,HORVU5HR1G084390.4,HORVU1HR1G061430.2,HORVU4HR1G050960.2,HORVU2HR1G073110.11,HORVU7HR1G001370.2,HORVU1HR1G069840.12,HORVU5HR1G039540.1,HORVU4HR1G041690.8,HORVU3HR1G092790.1,HORVU3HR1G040270.4,HORVU2HR1G028220.3,HORVU1HR1G042050.17,HORVU2HR1G023350.3,HORVU2HR1G001900.5,HORVU7HR1G019930…
Up-regulated	GO:BP	establishment of localization in cell	GO:0051649	1.92958e-11	10.7145	769	825	81	19520	HORVU2HR1G001790.10,HORVU4HR1G022950.11,HORVU3HR1G070240.2,HORVU7HR1G055570.11,HORVU0HR1G010890.1,HORVU5HR1G026120.1,HORVU7HR1G050000.4,HORVU1HR1G062330.8,HORVU1HR1G034400.6,HORVU5HR1G028810.1,HORVU5HR1G048010.1,HORVU5HR1G099670.11,HORVU4HR1G027600.1,HORVU3HR1G061000.5,HORVU4HR1G016640.2,HORVU6HR1G083220.5,HORVU4HR1G088390.1,HORVU7HR1G054550.1,HORVU5HR1G033310.1,HORVU6HR1G043390.18,HORVU5HR1G0843…
Up-regulated	GO:BP	localization	GO:0051179	7.21174e-11	10.142	3042	825	209	19520	HORVU5HR1G124650.12,HORVU1HR1G010210.2,HORVU6HR1G067980.1,HORVU5HR1G070400.3,HORVU7HR1G031430.5,HORVU3HR1G105870.5,HORVU3HR1G087690.1,HORVU3HR1G105890.2,HORVU2HR1G102720.2,HORVU0HR1G002600.1,HORVU2HR1G020450.1,HORVU3HR1G055740.11,HORVU0HR1G016830.1,HORVU2HR1G116970.2,HORVU7HR1G080490.1,HORVU5HR1G049260.1,HORVU7HR1G024360.2,HORVU2HR1G111140.3,HORVU2HR1G001790.10,HORVU6HR1G053710.1,HORVU7HR1G030080…
Up-regulated	GO:BP	establishment of localization	GO:0051234	1.70159e-10	9.76915	2932	825	202	19520	HORVU5HR1G124650.12,HORVU1HR1G010210.2,HORVU6HR1G067980.1,HORVU5HR1G070400.3,HORVU7HR1G031430.5,HORVU3HR1G105870.5,HORVU3HR1G087690.1,HORVU3HR1G105890.2,HORVU2HR1G102720.2,HORVU0HR1G002600.1,HORVU2HR1G020450.1,HORVU3HR1G055740.11,HORVU0HR1G016830.1,HORVU2HR1G116970.2,HORVU7HR1G080490.1,HORVU5HR1G049260.1,HORVU7HR1G024360.2,HORVU2HR1G111140.3,HORVU2HR1G001790.10,HORVU6HR1G053710.1,HORVU7HR1G030080…
Up-regulated	GO:BP	transport	GO:0006810	2.05701e-10	9.68676	2899	825	200	19520	HORVU5HR1G124650.12,HORVU1HR1G010210.2,HORVU6HR1G067980.1,HORVU5HR1G070400.3,HORVU7HR1G031430.5,HORVU3HR1G105870.5,HORVU3HR1G087690.1,HORVU3HR1G105890.2,HORVU2HR1G102720.2,HORVU0HR1G002600.1,HORVU2HR1G020450.1,HORVU3HR1G055740.11,HORVU0HR1G016830.1,HORVU2HR1G116970.2,HORVU7HR1G080490.1,HORVU5HR1G049260.1,HORVU7HR1G024360.2,HORVU2HR1G111140.3,HORVU2HR1G001790.10,HORVU6HR1G053710.1,HORVU7HR1G030080…
Up-regulated	GO:BP	cellular macromolecule localization	GO:0070727	3.05987e-10	9.5143	660	825	71	19520	HORVU2HR1G001790.10,HORVU4HR1G022950.11,HORVU3HR1G070240.2,HORVU7HR1G055570.11,HORVU0HR1G010890.1,HORVU2HR1G046740.9,HORVU5HR1G026120.1,HORVU7HR1G050000.4,HORVU1HR1G034400.6,HORVU7HR1G048810.1,HORVU5HR1G028810.1,HORVU5HR1G048010.1,HORVU5HR1G099670.11,HORVU3HR1G061000.5,HORVU4HR1G016640.2,HORVU6HR1G083220.5,HORVU4HR1G088390.1,HORVU7HR1G054550.1,HORVU3HR1G000490.3,HORVU5HR1G033310.1,HORVU6HR1G04339…
Up-regulated	GO:BP	cellular protein localization	GO:0034613	4.62173e-10	9.3352	651	825	70	19520	HORVU2HR1G001790.10,HORVU4HR1G022950.11,HORVU3HR1G070240.2,HORVU7HR1G055570.11,HORVU0HR1G010890.1,HORVU5HR1G026120.1,HORVU7HR1G050000.4,HORVU1HR1G034400.6,HORVU7HR1G048810.1,HORVU5HR1G028810.1,HORVU5HR1G048010.1,HORVU5HR1G099670.11,HORVU3HR1G061000.5,HORVU4HR1G016640.2,HORVU6HR1G083220.5,HORVU4HR1G088390.1,HORVU7HR1G054550.1,HORVU3HR1G000490.3,HORVU5HR1G033310.1,HORVU6HR1G043390.18,HORVU5HR1G0369…
Up-regulated	GO:BP	intracellular protein transport	GO:0006886	9.54463e-10	9.02024	574	825	64	19520	HORVU2HR1G001790.10,HORVU4HR1G022950.11,HORVU3HR1G070240.2,HORVU7HR1G055570.11,HORVU0HR1G010890.1,HORVU5HR1G026120.1,HORVU7HR1G050000.4,HORVU1HR1G034400.6,HORVU5HR1G028810.1,HORVU5HR1G048010.1,HORVU5HR1G099670.11,HORVU3HR1G061000.5,HORVU4HR1G016640.2,HORVU6HR1G083220.5,HORVU4HR1G088390.1,HORVU7HR1G054550.1,HORVU5HR1G033310.1,HORVU6HR1G043390.18,HORVU1HR1G061430.2,HORVU6HR1G087920.7,HORVU2HR1G0731…
Up-regulated	GO:BP	secretion by cell	GO:0032940	0.00364809	2.43793	101	825	16	19520	HORVU2HR1G116970.2,HORVU7HR1G030080.3,HORVU3HR1G094660.2,HORVU3HR1G073850.1,HORVU2HR1G123350.18,HORVU5HR1G026120.1,HORVU6HR1G043390.18,HORVU1HR1G023500.11,HORVU1HR1G042050.17,HORVU3HR1G086830.6,HORVU2HR1G052050.6,HORVU2HR1G009890.1,HORVU7HR1G061640.1,HORVU3HR1G094570.3,HORVU5HR1G035100.10,HORVU2HR1G069390.1
Up-regulated	GO:BP	secretion	GO:0046903	0.0078094	2.10738	107	825	16	19520	HORVU2HR1G116970.2,HORVU7HR1G030080.3,HORVU3HR1G094660.2,HORVU3HR1G073850.1,HORVU2HR1G123350.18,HORVU5HR1G026120.1,HORVU6HR1G043390.18,HORVU1HR1G023500.11,HORVU1HR1G042050.17,HORVU3HR1G086830.6,HORVU2HR1G052050.6,HORVU2HR1G009890.1,HORVU7HR1G061640.1,HORVU3HR1G094570.3,HORVU5HR1G035100.10,HORVU2HR1G069390.1
Up-regulated	GO:BP	peptidyl-amino acid modification	GO:0018193	0.00835169	2.07823	489	825	42	19520	HORVU2HR1G044890.2,HORVU1HR1G087050.1,HORVU2HR1G044600.19,HORVU2HR1G107560.6,HORVU5HR1G087210.3,HORVU2HR1G066950.2,HORVU7HR1G055570.11,HORVU2HR1G087030.1,HORVU6HR1G014700.1,HORVU3HR1G024150.12,HORVU4HR1G078080.2,HORVU3HR1G087550.4,HORVU4HR1G002720.2,HORVU5HR1G078430.2,HORVU5HR1G097220.2,HORVU6HR1G050970.4,HORVU2HR1G106760.1,HORVU4HR1G082730.1,HORVU7HR1G089500.2,HORVU1HR1G069080.1,HORVU1HR1G092710…
Up-regulated	GO:BP	export from cell	GO:0140352	0.0121694	1.91473	123	825	17	19520	HORVU2HR1G116970.2,HORVU7HR1G030080.3,HORVU3HR1G094660.2,HORVU3HR1G073850.1,HORVU2HR1G123350.18,HORVU5HR1G026120.1,HORVU1HR1G003080.1,HORVU6HR1G043390.18,HORVU1HR1G023500.11,HORVU1HR1G042050.17,HORVU3HR1G086830.6,HORVU2HR1G052050.6,HORVU2HR1G009890.1,HORVU7HR1G061640.1,HORVU3HR1G094570.3,HORVU5HR1G035100.10,HORVU2HR1G069390.1
Up-regulated	GO:BP	cellular protein modification process	GO:0006464	0.015464	1.81068	3287	825	184	19520	HORVU5HR1G012190.1,HORVU0HR1G014650.2,HORVU0HR1G011730.1,HORVU5HR1G087440.2,HORVU4HR1G082100.2,HORVU3HR1G105610.3,HORVU6HR1G004700.1,HORVU2HR1G044890.2,HORVU2HR1G121290.2,HORVU3HR1G025810.1,HORVU7HR1G028470.1,HORVU1HR1G087050.1,HORVU2HR1G108690.1,HORVU2HR1G113080.3,HORVU0HR1G006150.2,HORVU5HR1G023720.1,HORVU6HR1G067480.1,HORVU7HR1G050240.1,HORVU7HR1G010320.19,HORVU1HR1G005090.2,HORVU5HR1G084860.1…
Up-regulated	GO:BP	protein modification process	GO:0036211	0.015464	1.81068	3287	825	184	19520	HORVU5HR1G012190.1,HORVU0HR1G014650.2,HORVU0HR1G011730.1,HORVU5HR1G087440.2,HORVU4HR1G082100.2,HORVU3HR1G105610.3,HORVU6HR1G004700.1,HORVU2HR1G044890.2,HORVU2HR1G121290.2,HORVU3HR1G025810.1,HORVU7HR1G028470.1,HORVU1HR1G087050.1,HORVU2HR1G108690.1,HORVU2HR1G113080.3,HORVU0HR1G006150.2,HORVU5HR1G023720.1,HORVU6HR1G067480.1,HORVU7HR1G050240.1,HORVU7HR1G010320.19,HORVU1HR1G005090.2,HORVU5HR1G084860.1…
Up-regulated	GO:BP	exocytosis	GO:0006887	0.0198189	1.70292	91	825	14	19520	HORVU2HR1G116970.2,HORVU7HR1G030080.3,HORVU3HR1G094660.2,HORVU3HR1G073850.1,HORVU2HR1G123350.18,HORVU5HR1G026120.1,HORVU6HR1G043390.18,HORVU3HR1G086830.6,HORVU2HR1G052050.6,HORVU2HR1G009890.1,HORVU7HR1G061640.1,HORVU3HR1G094570.3,HORVU5HR1G035100.10,HORVU2HR1G069390.1
Up-regulated	GO:BP	neutral amino acid transport	GO:0015804	0.0326367	1.48629	6	825	4	19520	HORVU3HR1G105870.5,HORVU3HR1G105890.2,HORVU7HR1G035670.1,HORVU3HR1G053090.4
Up-regulated	GO:CC	endomembrane system	GO:0012505	2.36687e-23	22.6258	1482	845	156	19256	HORVU6HR1G078930.1,HORVU4HR1G022950.11,HORVU1HR1G052450.8,HORVU3HR1G066450.2,HORVU3HR1G070240.2,HORVU5HR1G061580.4,HORVU4HR1G005300.1,HORVU3HR1G087110.4,HORVU5HR1G045700.3,HORVU2HR1G066950.2,HORVU7HR1G055570.11,HORVU4HR1G051070.23,HORVU3HR1G091350.6,HORVU0HR1G010890.1,HORVU6HR1G051760.12,HORVU3HR1G052980.1,HORVU1HR1G057490.4,HORVU6HR1G031530.1,HORVU4HR1G054120.4,HORVU6HR1G066510.9,HORVU5HR1G02612…
Up-regulated	GO:CC	Golgi apparatus	GO:0005794	1.26195e-14	13.899	710	845	84	19256	HORVU6HR1G078930.1,HORVU4HR1G022950.11,HORVU5HR1G061580.4,HORVU4HR1G005300.1,HORVU3HR1G087110.4,HORVU5HR1G045700.3,HORVU2HR1G066950.2,HORVU7HR1G055570.11,HORVU4HR1G051070.23,HORVU3HR1G091350.6,HORVU0HR1G010890.1,HORVU1HR1G057490.4,HORVU6HR1G031530.1,HORVU4HR1G054120.4,HORVU6HR1G066510.9,HORVU7HR1G050000.4,HORVU3HR1G043380.2,HORVU1HR1G073040.1,HORVU5HR1G028810.1,HORVU5HR1G048010.1,HORVU4HR1G027600…
Up-regulated	GO:CC	Golgi-associated vesicle	GO:0005798	2.07526e-11	10.6829	109	845	27	19256	HORVU0HR1G010890.1,HORVU5HR1G028810.1,HORVU5HR1G048010.1,HORVU4HR1G016640.2,HORVU4HR1G088390.1,HORVU7HR1G054550.1,HORVU6HR1G087920.7,HORVU4HR1G050960.2,HORVU2HR1G073110.11,HORVU7HR1G001370.2,HORVU4HR1G024710.12,HORVU1HR1G069840.12,HORVU5HR1G039540.1,HORVU4HR1G041690.8,HORVU3HR1G092790.1,HORVU7HR1G027050.3,HORVU3HR1G040270.4,HORVU2HR1G028220.3,HORVU1HR1G042050.17,HORVU2HR1G023350.3,HORVU2HR1G00190…
Up-regulated	GO:CC	cytoplasmic vesicle	GO:0031410	4.8198e-11	10.317	356	845	50	19256	HORVU4HR1G022950.11,HORVU3HR1G070240.2,HORVU5HR1G061580.4,HORVU0HR1G010890.1,HORVU4HR1G054120.4,HORVU1HR1G034400.6,HORVU5HR1G028810.1,HORVU5HR1G048010.1,HORVU4HR1G016640.2,HORVU4HR1G088390.1,HORVU7HR1G054550.1,HORVU6HR1G043390.18,HORVU6HR1G087920.7,HORVU4HR1G050960.2,HORVU2HR1G073110.11,HORVU3HR1G088490.1,HORVU7HR1G001370.2,HORVU4HR1G024710.12,HORVU1HR1G069840.12,HORVU2HR1G030670.4,HORVU5HR1G0395…
Up-regulated	GO:CC	intracellular vesicle	GO:0097708	5.37528e-11	10.2696	357	845	50	19256	HORVU4HR1G022950.11,HORVU3HR1G070240.2,HORVU5HR1G061580.4,HORVU0HR1G010890.1,HORVU4HR1G054120.4,HORVU1HR1G034400.6,HORVU5HR1G028810.1,HORVU5HR1G048010.1,HORVU4HR1G016640.2,HORVU4HR1G088390.1,HORVU7HR1G054550.1,HORVU6HR1G043390.18,HORVU6HR1G087920.7,HORVU4HR1G050960.2,HORVU2HR1G073110.11,HORVU3HR1G088490.1,HORVU7HR1G001370.2,HORVU4HR1G024710.12,HORVU1HR1G069840.12,HORVU2HR1G030670.4,HORVU5HR1G0395…
Up-regulated	GO:CC	vesicle	GO:0031982	6.90292e-11	10.161	384	845	52	19256	HORVU4HR1G022950.11,HORVU3HR1G070240.2,HORVU5HR1G061580.4,HORVU0HR1G010890.1,HORVU4HR1G054120.4,HORVU1HR1G034400.6,HORVU5HR1G028810.1,HORVU5HR1G048010.1,HORVU4HR1G016640.2,HORVU4HR1G088390.1,HORVU7HR1G054550.1,HORVU6HR1G043390.18,HORVU6HR1G087920.7,HORVU4HR1G050960.2,HORVU2HR1G073110.11,HORVU3HR1G088490.1,HORVU7HR1G001370.2,HORVU4HR1G024710.12,HORVU1HR1G069840.12,HORVU2HR1G030670.4,HORVU5HR1G0395…
Up-regulated	GO:CC	bounding membrane of organelle	GO:0098588	3.34438e-10	9.47568	658	845	71	19256	HORVU7HR1G025230.3,HORVU3HR1G070240.2,HORVU5HR1G061580.4,HORVU4HR1G005300.1,HORVU5HR1G045700.3,HORVU4HR1G051070.23,HORVU0HR1G010890.1,HORVU3HR1G052980.1,HORVU6HR1G066510.9,HORVU7HR1G050000.4,HORVU1HR1G073040.1,HORVU5HR1G028810.1,HORVU5HR1G048010.1,HORVU4HR1G016640.2,HORVU1HR1G062940.2,HORVU6HR1G083220.5,HORVU4HR1G088390.1,HORVU5HR1G113880.27,HORVU3HR1G000490.3,HORVU7HR1G025000.3,HORVU7HR1G035670.…
Up-regulated	GO:CC	coated vesicle	GO:0030135	1.26239e-09	8.89881	128	845	27	19256	HORVU3HR1G070240.2,HORVU0HR1G010890.1,HORVU5HR1G028810.1,HORVU5HR1G048010.1,HORVU4HR1G016640.2,HORVU4HR1G088390.1,HORVU7HR1G054550.1,HORVU6HR1G087920.7,HORVU4HR1G050960.2,HORVU2HR1G073110.11,HORVU7HR1G001370.2,HORVU4HR1G024710.12,HORVU1HR1G069840.12,HORVU5HR1G039540.1,HORVU4HR1G041690.8,HORVU3HR1G092790.1,HORVU7HR1G027050.3,HORVU3HR1G040270.4,HORVU2HR1G028220.3,HORVU1HR1G042050.17,HORVU2HR1G02335…
Up-regulated	GO:CC	coated membrane	GO:0048475	3.13592e-09	8.50364	88	845	22	19256	HORVU3HR1G070240.2,HORVU0HR1G010890.1,HORVU5HR1G028810.1,HORVU5HR1G048010.1,HORVU4HR1G016640.2,HORVU4HR1G088390.1,HORVU6HR1G087920.7,HORVU2HR1G073110.11,HORVU3HR1G055990.1,HORVU4HR1G024710.12,HORVU4HR1G041690.8,HORVU7HR1G027050.3,HORVU3HR1G040270.4,HORVU1HR1G042050.17,HORVU2HR1G023350.3,HORVU4HR1G045980.24,HORVU2HR1G001900.5,HORVU7HR1G019930.1,HORVU1HR1G079050.3,HORVU3HR1G066020.1,HORVU5HR1G06709…
Up-regulated	GO:CC	membrane coat	GO:0030117	3.13592e-09	8.50364	88	845	22	19256	HORVU3HR1G070240.2,HORVU0HR1G010890.1,HORVU5HR1G028810.1,HORVU5HR1G048010.1,HORVU4HR1G016640.2,HORVU4HR1G088390.1,HORVU6HR1G087920.7,HORVU2HR1G073110.11,HORVU3HR1G055990.1,HORVU4HR1G024710.12,HORVU4HR1G041690.8,HORVU7HR1G027050.3,HORVU3HR1G040270.4,HORVU1HR1G042050.17,HORVU2HR1G023350.3,HORVU4HR1G045980.24,HORVU2HR1G001900.5,HORVU7HR1G019930.1,HORVU1HR1G079050.3,HORVU3HR1G066020.1,HORVU5HR1G06709…
Up-regulated	GO:CC	organelle membrane	GO:0031090	8.97817e-09	8.04681	1261	845	106	19256	HORVU7HR1G025230.3,HORVU3HR1G070240.2,HORVU5HR1G061580.4,HORVU4HR1G005300.1,HORVU5HR1G045700.3,HORVU4HR1G051070.23,HORVU0HR1G010890.1,HORVU6HR1G051760.12,HORVU3HR1G052980.1,HORVU6HR1G066510.9,HORVU7HR1G050000.4,HORVU1HR1G091090.9,HORVU3HR1G043380.2,HORVU1HR1G073040.1,HORVU5HR1G092250.3,HORVU5HR1G028810.1,HORVU5HR1G048010.1,HORVU4HR1G016640.2,HORVU1HR1G062940.2,HORVU4HR1G082730.1,HORVU6HR1G083220.…
Up-regulated	GO:CC	endoplasmic reticulum membrane	GO:0005789	1.3973e-08	7.85471	311	845	42	19256	HORVU6HR1G051760.12,HORVU1HR1G091090.9,HORVU1HR1G073040.1,HORVU5HR1G092250.3,HORVU4HR1G082730.1,HORVU1HR1G093800.4,HORVU7HR1G054550.1,HORVU5HR1G077120.5,HORVU1HR1G061430.2,HORVU4HR1G050960.2,HORVU0HR1G016720.1,HORVU6HR1G014860.1,HORVU3HR1G043390.2,HORVU7HR1G056570.13,HORVU6HR1G066710.2,HORVU1HR1G069840.12,HORVU5HR1G039540.1,HORVU7HR1G071270.1,HORVU4HR1G041690.8,HORVU5HR1G018730.3,HORVU3HR1G063250…
Up-regulated	GO:CC	nuclear outer membrane-endoplasmic reticulum membrane network	GO:0042175	1.5484e-08	7.81012	312	845	42	19256	HORVU6HR1G051760.12,HORVU1HR1G091090.9,HORVU1HR1G073040.1,HORVU5HR1G092250.3,HORVU4HR1G082730.1,HORVU1HR1G093800.4,HORVU7HR1G054550.1,HORVU5HR1G077120.5,HORVU1HR1G061430.2,HORVU4HR1G050960.2,HORVU0HR1G016720.1,HORVU6HR1G014860.1,HORVU3HR1G043390.2,HORVU7HR1G056570.13,HORVU6HR1G066710.2,HORVU1HR1G069840.12,HORVU5HR1G039540.1,HORVU7HR1G071270.1,HORVU4HR1G041690.8,HORVU5HR1G018730.3,HORVU3HR1G063250…
Up-regulated	GO:CC	cytoplasmic vesicle membrane	GO:0030659	1.58872e-08	7.79895	95	845	22	19256	HORVU3HR1G070240.2,HORVU5HR1G061580.4,HORVU0HR1G010890.1,HORVU5HR1G028810.1,HORVU5HR1G048010.1,HORVU4HR1G016640.2,HORVU4HR1G088390.1,HORVU6HR1G087920.7,HORVU2HR1G073110.11,HORVU7HR1G001370.2,HORVU4HR1G024710.12,HORVU1HR1G069840.12,HORVU5HR1G039540.1,HORVU4HR1G041690.8,HORVU7HR1G027050.3,HORVU3HR1G040270.4,HORVU1HR1G042050.17,HORVU2HR1G023350.3,HORVU2HR1G001900.5,HORVU7HR1G019930.1,HORVU5HR1G06709…
Up-regulated	GO:CC	endoplasmic reticulum	GO:0005783	1.76605e-08	7.753	499	845	56	19256	HORVU1HR1G052450.8,HORVU3HR1G066450.2,HORVU2HR1G066950.2,HORVU7HR1G055570.11,HORVU3HR1G052980.1,HORVU6HR1G031530.1,HORVU3HR1G024150.12,HORVU5HR1G105780.2,HORVU5HR1G092250.3,HORVU5HR1G097220.2,HORVU0HR1G030120.1,HORVU4HR1G027600.1,HORVU4HR1G082730.1,HORVU7HR1G054550.1,HORVU3HR1G000490.3,HORVU5HR1G077120.5,HORVU4HR1G006740.1,HORVU2HR1G120590.2,HORVU1HR1G061430.2,HORVU5HR1G063470.1,HORVU0HR1G016720.…
Up-regulated	GO:CC	Golgi-associated vesicle membrane	GO:0030660	1.83616e-08	7.73609	87	845	21	19256	HORVU0HR1G010890.1,HORVU5HR1G028810.1,HORVU5HR1G048010.1,HORVU4HR1G016640.2,HORVU4HR1G088390.1,HORVU6HR1G087920.7,HORVU2HR1G073110.11,HORVU7HR1G001370.2,HORVU4HR1G024710.12,HORVU1HR1G069840.12,HORVU5HR1G039540.1,HORVU4HR1G041690.8,HORVU7HR1G027050.3,HORVU3HR1G040270.4,HORVU1HR1G042050.17,HORVU2HR1G023350.3,HORVU2HR1G001900.5,HORVU7HR1G019930.1,HORVU7HR1G000380.8,HORVU5HR1G067090.1,HORVU3HR1G02773…
Up-regulated	GO:CC	coated vesicle membrane	GO:0030662	1.83616e-08	7.73609	87	845	21	19256	HORVU3HR1G070240.2,HORVU0HR1G010890.1,HORVU5HR1G028810.1,HORVU5HR1G048010.1,HORVU4HR1G016640.2,HORVU4HR1G088390.1,HORVU6HR1G087920.7,HORVU2HR1G073110.11,HORVU7HR1G001370.2,HORVU4HR1G024710.12,HORVU1HR1G069840.12,HORVU5HR1G039540.1,HORVU4HR1G041690.8,HORVU7HR1G027050.3,HORVU3HR1G040270.4,HORVU1HR1G042050.17,HORVU2HR1G023350.3,HORVU2HR1G001900.5,HORVU7HR1G019930.1,HORVU5HR1G067090.1,HORVU3HR1G02773…
Up-regulated	GO:CC	vesicle membrane	GO:0012506	1.97695e-08	7.704	96	845	22	19256	HORVU3HR1G070240.2,HORVU5HR1G061580.4,HORVU0HR1G010890.1,HORVU5HR1G028810.1,HORVU5HR1G048010.1,HORVU4HR1G016640.2,HORVU4HR1G088390.1,HORVU6HR1G087920.7,HORVU2HR1G073110.11,HORVU7HR1G001370.2,HORVU4HR1G024710.12,HORVU1HR1G069840.12,HORVU5HR1G039540.1,HORVU4HR1G041690.8,HORVU7HR1G027050.3,HORVU3HR1G040270.4,HORVU1HR1G042050.17,HORVU2HR1G023350.3,HORVU2HR1G001900.5,HORVU7HR1G019930.1,HORVU5HR1G06709…
Up-regulated	GO:CC	Golgi membrane	GO:0000139	5.58351e-08	7.25309	227	845	34	19256	HORVU5HR1G061580.4,HORVU4HR1G005300.1,HORVU5HR1G045700.3,HORVU4HR1G051070.23,HORVU6HR1G066510.9,HORVU7HR1G050000.4,HORVU1HR1G073040.1,HORVU6HR1G083220.5,HORVU4HR1G088390.1,HORVU3HR1G000490.3,HORVU1HR1G029110.2,HORVU6HR1G055030.3,HORVU4HR1G050960.2,HORVU1HR1G023500.11,HORVU5HR1G025740.13,HORVU7HR1G001370.2,HORVU5HR1G039540.1,HORVU4HR1G041690.8,HORVU3HR1G092790.1,HORVU3HR1G040270.4,HORVU3HR1G085630…
Up-regulated	GO:CC	vesicle coat	GO:0030120	2.1134e-07	6.67502	72	845	18	19256	HORVU3HR1G070240.2,HORVU0HR1G010890.1,HORVU5HR1G028810.1,HORVU5HR1G048010.1,HORVU4HR1G016640.2,HORVU4HR1G088390.1,HORVU6HR1G087920.7,HORVU2HR1G073110.11,HORVU4HR1G024710.12,HORVU4HR1G041690.8,HORVU7HR1G027050.3,HORVU3HR1G040270.4,HORVU1HR1G042050.17,HORVU2HR1G023350.3,HORVU2HR1G001900.5,HORVU7HR1G019930.1,HORVU5HR1G067090.1,HORVU3HR1G027730.3
Up-regulated	GO:CC	COPII-coated ER to Golgi transport vesicle	GO:0030134	5.85099e-07	6.23277	52	845	15	19256	HORVU4HR1G016640.2,HORVU7HR1G054550.1,HORVU4HR1G050960.2,HORVU2HR1G073110.11,HORVU7HR1G001370.2,HORVU1HR1G069840.12,HORVU5HR1G039540.1,HORVU4HR1G041690.8,HORVU3HR1G092790.1,HORVU2HR1G028220.3,HORVU2HR1G023350.3,HORVU2HR1G001900.5,HORVU4HR1G052080.1,HORVU3HR1G027730.3,HORVU2HR1G079830.2
Up-regulated	GO:CC	vesicle tethering complex	GO:0099023	1.11524e-05	4.95263	101	845	19	19256	HORVU2HR1G116970.2,HORVU7HR1G030080.3,HORVU4HR1G022950.11,HORVU3HR1G094660.2,HORVU3HR1G073850.1,HORVU1HR1G057490.4,HORVU2HR1G123350.18,HORVU4HR1G027600.1,HORVU5HR1G084390.4,HORVU5HR1G025740.13,HORVU3HR1G088490.1,HORVU2HR1G052050.6,HORVU2HR1G009840.1,HORVU2HR1G009890.1,HORVU7HR1G061640.1,HORVU3HR1G094570.3,HORVU4HR1G008150.1,HORVU5HR1G035100.10,HORVU2HR1G069390.1
Up-regulated	GO:CC	transport vesicle membrane	GO:0030658	1.83084e-05	4.73735	57	845	14	19256	HORVU5HR1G061580.4,HORVU5HR1G048010.1,HORVU4HR1G016640.2,HORVU6HR1G087920.7,HORVU2HR1G073110.11,HORVU7HR1G001370.2,HORVU4HR1G024710.12,HORVU1HR1G069840.12,HORVU5HR1G039540.1,HORVU4HR1G041690.8,HORVU7HR1G027050.3,HORVU2HR1G023350.3,HORVU2HR1G001900.5,HORVU3HR1G027730.3
Up-regulated	GO:CC	transport vesicle	GO:0030133	2.31677e-05	4.63512	58	845	14	19256	HORVU5HR1G061580.4,HORVU5HR1G048010.1,HORVU4HR1G016640.2,HORVU6HR1G087920.7,HORVU2HR1G073110.11,HORVU7HR1G001370.2,HORVU4HR1G024710.12,HORVU1HR1G069840.12,HORVU5HR1G039540.1,HORVU4HR1G041690.8,HORVU7HR1G027050.3,HORVU2HR1G023350.3,HORVU2HR1G001900.5,HORVU3HR1G027730.3
Up-regulated	GO:CC	whole membrane	GO:0098805	6.22439e-05	4.2059	473	845	46	19256	HORVU7HR1G025230.3,HORVU3HR1G070240.2,HORVU5HR1G061580.4,HORVU0HR1G010890.1,HORVU3HR1G052980.1,HORVU5HR1G028810.1,HORVU5HR1G048010.1,HORVU4HR1G016640.2,HORVU1HR1G062940.2,HORVU4HR1G088390.1,HORVU5HR1G113880.27,HORVU7HR1G025000.3,HORVU7HR1G035670.1,HORVU6HR1G087920.7,HORVU5HR1G063470.1,HORVU2HR1G073110.11,HORVU3HR1G043390.2,HORVU7HR1G001370.2,HORVU4HR1G024710.12,HORVU1HR1G069840.12,HORVU5HR1G03954…
Up-regulated	GO:CC	cytoplasm	GO:0005737	0.000153128	3.81494	7077	845	377	19256	HORVU0HR1G011730.1,HORVU3HR1G002830.1,HORVU6HR1G078930.1,HORVU3HR1G105610.3,HORVU7HR1G028470.1,HORVU3HR1G018530.3,HORVU5HR1G023720.1,HORVU7HR1G027430.1,HORVU2HR1G116970.2,HORVU7HR1G050240.1,HORVU0HR1G000340.3,HORVU3HR1G047230.5,HORVU7HR1G030080.3,HORVU7HR1G049140.1,HORVU4HR1G020060.12,HORVU7HR1G025230.3,HORVU1HR1G049230.1,HORVU5HR1G066850.1,HORVU4HR1G022950.11,HORVU1HR1G052450.8,HORVU3HR1G066450.…
Up-regulated	GO:CC	endopeptidase complex	GO:1905369	0.000232743	3.63312	79	845	15	19256	HORVU7HR1G032070.1,HORVU3HR1G063250.2,HORVU5HR1G076600.2,HORVU2HR1G064590.1,HORVU3HR1G037790.1,HORVU0HR1G040340.1,HORVU3HR1G091850.2,HORVU4HR1G076770.2,HORVU4HR1G040770.2,HORVU5HR1G076130.3,HORVU7HR1G084550.2,HORVU4HR1G071480.8,HORVU6HR1G083150.1,HORVU6HR1G017500.1,HORVU6HR1G021020.1
Up-regulated	GO:CC	intrinsic component of Golgi membrane	GO:0031228	0.000564063	3.24867	30	845	9	19256	HORVU1HR1G073040.1,HORVU3HR1G000490.3,HORVU6HR1G055030.3,HORVU4HR1G050960.2,HORVU1HR1G023500.11,HORVU3HR1G092790.1,HORVU3HR1G085630.11,HORVU5HR1G049960.2,HORVU3HR1G051550.1
Up-regulated	GO:CC	integral component of Golgi membrane	GO:0030173	0.000564063	3.24867	30	845	9	19256	HORVU1HR1G073040.1,HORVU3HR1G000490.3,HORVU6HR1G055030.3,HORVU4HR1G050960.2,HORVU1HR1G023500.11,HORVU3HR1G092790.1,HORVU3HR1G085630.11,HORVU5HR1G049960.2,HORVU3HR1G051550.1
Up-regulated	GO:CC	ER to Golgi transport vesicle membrane	GO:0012507	0.000764	3.11691	31	845	9	19256	HORVU4HR1G016640.2,HORVU2HR1G073110.11,HORVU7HR1G001370.2,HORVU1HR1G069840.12,HORVU5HR1G039540.1,HORVU4HR1G041690.8,HORVU2HR1G023350.3,HORVU2HR1G001900.5,HORVU3HR1G027730.3
Up-regulated	GO:CC	clathrin coat	GO:0030118	0.0013505	2.86951	33	845	9	19256	HORVU3HR1G070240.2,HORVU5HR1G048010.1,HORVU6HR1G087920.7,HORVU3HR1G055990.1,HORVU4HR1G024710.12,HORVU7HR1G027050.3,HORVU4HR1G045980.24,HORVU1HR1G079050.3,HORVU3HR1G066020.1
Up-regulated	GO:CC	peptidase complex	GO:1905368	0.00161354	2.79222	103	845	16	19256	HORVU7HR1G032070.1,HORVU3HR1G063250.2,HORVU5HR1G076600.2,HORVU2HR1G064590.1,HORVU3HR1G037790.1,HORVU0HR1G040340.1,HORVU3HR1G091850.2,HORVU4HR1G076770.2,HORVU4HR1G040770.2,HORVU5HR1G076130.3,HORVU7HR1G084550.2,HORVU3HR1G085840.2,HORVU4HR1G071480.8,HORVU6HR1G083150.1,HORVU6HR1G017500.1,HORVU6HR1G021020.1
Up-regulated	GO:CC	proteasome complex	GO:0000502	0.00175444	2.75586	71	845	13	19256	HORVU7HR1G032070.1,HORVU5HR1G076600.2,HORVU2HR1G064590.1,HORVU3HR1G037790.1,HORVU0HR1G040340.1,HORVU4HR1G076770.2,HORVU4HR1G040770.2,HORVU5HR1G076130.3,HORVU7HR1G084550.2,HORVU4HR1G071480.8,HORVU6HR1G083150.1,HORVU6HR1G017500.1,HORVU6HR1G021020.1
Up-regulated	GO:CC	integral component of organelle membrane	GO:0031301	0.00316123	2.50014	171	845	21	19256	HORVU1HR1G091090.9,HORVU1HR1G073040.1,HORVU5HR1G092250.3,HORVU1HR1G062940.2,HORVU1HR1G093800.4,HORVU3HR1G000490.3,HORVU6HR1G055030.3,HORVU4HR1G050960.2,HORVU1HR1G023500.11,HORVU6HR1G014860.1,HORVU4HR1G086330.5,HORVU3HR1G063250.2,HORVU3HR1G092790.1,HORVU3HR1G085630.11,HORVU6HR1G065940.1,HORVU5HR1G049960.2,HORVU3HR1G091850.2,HORVU7HR1G000380.8,HORVU3HR1G051550.1,HORVU2HR1G066560.1,HORVU1HR1G033270.2
Up-regulated	GO:CC	intrinsic component of organelle membrane	GO:0031300	0.00411772	2.38534	174	845	21	19256	HORVU1HR1G091090.9,HORVU1HR1G073040.1,HORVU5HR1G092250.3,HORVU1HR1G062940.2,HORVU1HR1G093800.4,HORVU3HR1G000490.3,HORVU6HR1G055030.3,HORVU4HR1G050960.2,HORVU1HR1G023500.11,HORVU6HR1G014860.1,HORVU4HR1G086330.5,HORVU3HR1G063250.2,HORVU3HR1G092790.1,HORVU3HR1G085630.11,HORVU6HR1G065940.1,HORVU5HR1G049960.2,HORVU3HR1G091850.2,HORVU7HR1G000380.8,HORVU3HR1G051550.1,HORVU2HR1G066560.1,HORVU1HR1G033270.2
Up-regulated	GO:CC	integral component of endoplasmic reticulum membrane	GO:0030176	0.00558343	2.2531	68	845	12	19256	HORVU1HR1G091090.9,HORVU1HR1G073040.1,HORVU5HR1G092250.3,HORVU1HR1G093800.4,HORVU6HR1G014860.1,HORVU3HR1G063250.2,HORVU3HR1G085630.11,HORVU6HR1G065940.1,HORVU3HR1G091850.2,HORVU7HR1G000380.8,HORVU2HR1G066560.1,HORVU1HR1G033270.2
Up-regulated	GO:CC	clathrin adaptor complex	GO:0030131	0.00602973	2.2197	16	845	6	19256	HORVU6HR1G087920.7,HORVU3HR1G055990.1,HORVU7HR1G027050.3,HORVU4HR1G045980.24,HORVU1HR1G079050.3,HORVU3HR1G066020.1
Up-regulated	GO:CC	COPII vesicle coat	GO:0030127	0.00602973	2.2197	16	845	6	19256	HORVU4HR1G016640.2,HORVU2HR1G073110.11,HORVU4HR1G041690.8,HORVU2HR1G023350.3,HORVU2HR1G001900.5,HORVU3HR1G027730.3
Up-regulated	GO:CC	membrane	GO:0016020	0.00636533	2.19618	9974	845	494	19256	HORVU3HR1G011870.3,HORVU5HR1G124650.12,HORVU2HR1G004610.1,HORVU1HR1G010210.2,HORVU6HR1G067980.1,HORVU5HR1G070400.3,HORVU3HR1G097300.1,HORVU5HR1G012190.1,HORVU0HR1G014650.2,HORVU0HR1G007470.2,HORVU3HR1G117400.2,HORVU5HR1G056420.2,HORVU6HR1G078930.1,HORVU7HR1G031430.5,HORVU5HR1G018750.2,HORVU5HR1G087440.2,HORVU3HR1G105870.5,HORVU4HR1G082100.2,HORVU6HR1G004700.1,HORVU2HR1G044890.2,HORVU4HR1G043760.2…
Up-regulated	GO:CC	intrinsic component of endoplasmic reticulum membrane	GO:0031227	0.00870103	2.06043	71	845	12	19256	HORVU1HR1G091090.9,HORVU1HR1G073040.1,HORVU5HR1G092250.3,HORVU1HR1G093800.4,HORVU6HR1G014860.1,HORVU3HR1G063250.2,HORVU3HR1G085630.11,HORVU6HR1G065940.1,HORVU3HR1G091850.2,HORVU7HR1G000380.8,HORVU2HR1G066560.1,HORVU1HR1G033270.2
Up-regulated	GO:CC	AP-type membrane coat adaptor complex	GO:0030119	0.0338389	1.47058	21	845	6	19256	HORVU6HR1G087920.7,HORVU3HR1G055990.1,HORVU7HR1G027050.3,HORVU4HR1G045980.24,HORVU1HR1G079050.3,HORVU3HR1G066020.1
Up-regulated	GO:CC	Golgi apparatus subcompartment	GO:0098791	0.0346001	1.46092	173	845	19	19256	HORVU4HR1G022950.11,HORVU5HR1G061580.4,HORVU4HR1G054120.4,HORVU7HR1G050000.4,HORVU1HR1G073040.1,HORVU6HR1G072070.1,HORVU4HR1G063180.2,HORVU7HR1G073550.1,HORVU7HR1G061220.1,HORVU5HR1G117920.12,HORVU3HR1G085630.11,HORVU6HR1G085950.5,HORVU6HR1G003900.3,HORVU1HR1G001910.2,HORVU1HR1G032310.13,HORVU1HR1G029490.2,HORVU3HR1G051550.1,HORVU4HR1G039540.2,HORVU5HR1G065500.1
Up-regulated	GO:CC	COPI-coated vesicle membrane	GO:0030663	0.0499887	1.30113	31	845	7	19256	HORVU0HR1G010890.1,HORVU5HR1G028810.1,HORVU4HR1G088390.1,HORVU3HR1G040270.4,HORVU1HR1G042050.17,HORVU7HR1G019930.1,HORVU5HR1G067090.1
Up-regulated	GO:CC	COPI-coated vesicle	GO:0030137	0.0499887	1.30113	31	845	7	19256	HORVU0HR1G010890.1,HORVU5HR1G028810.1,HORVU4HR1G088390.1,HORVU3HR1G040270.4,HORVU1HR1G042050.17,HORVU7HR1G019930.1,HORVU5HR1G067090.1
Up-regulated	GO:CC	COPI vesicle coat	GO:0030126	0.0499887	1.30113	31	845	7	19256	HORVU0HR1G010890.1,HORVU5HR1G028810.1,HORVU4HR1G088390.1,HORVU3HR1G040270.4,HORVU1HR1G042050.17,HORVU7HR1G019930.1,HORVU5HR1G067090.1
Down-regulated	GO:MF	chlorophyll binding	GO:0016168	0.00132997	2.87616	61	709	11	21992	HORVU5HR1G004580.3,HORVU1HR1G088870.2,HORVU2HR1G121790.2,HORVU6HR1G049390.3,HORVU4HR1G015260.2,HORVU2HR1G041270.2,HORVU2HR1G040780.4,HORVU5HR1G109260.1,HORVU5HR1G109360.1,HORVU5HR1G082420.2,HORVU7HR1G058120.1
Down-regulated	GO:MF	proton channel activity	GO:0015252	0.0074195	2.12963	48	709	9	21992	HORVU0HR1G034610.1,HORVU0HR1G037590.1,HORVU6HR1G049160.1,HORVU6HR1G022990.1,HORVU4HR1G011090.1,HORVU0HR1G026070.1,HORVU0HR1G029770.1,HORVU0HR1G036350.1,HORVU0HR1G036860.1
Down-regulated	GO:MF	proton-transporting ATP synthase activity, rotational mechanism	GO:0046933	0.0074195	2.12963	48	709	9	21992	HORVU0HR1G034610.1,HORVU0HR1G037590.1,HORVU6HR1G049160.1,HORVU6HR1G022990.1,HORVU4HR1G011090.1,HORVU0HR1G026070.1,HORVU0HR1G029770.1,HORVU0HR1G036350.1,HORVU0HR1G036860.1
Down-regulated	GO:BP	photosynthesis	GO:0015979	0.000202998	3.69251	400	627	34	19520	HORVU3HR1G041160.4,HORVU5HR1G004580.3,HORVU6HR1G060100.1,HORVU0HR1G031480.1,HORVU6HR1G049300.1,HORVU4HR1G010270.2,HORVU1HR1G088870.2,HORVU5HR1G054600.8,HORVU3HR1G021910.3,HORVU2HR1G121790.2,HORVU3HR1G009210.1,HORVU7HR1G047000.6,HORVU6HR1G049390.3,HORVU2HR1G057700.2,HORVU5HR1G071920.1,HORVU4HR1G015260.2,HORVU2HR1G041270.2,HORVU5HR1G051010.2,HORVU0HR1G003270.1,HORVU7HR1G051160.7,HORVU5HR1G113900.2,…
Down-regulated	GO:BP	response to light stimulus	GO:0009416	0.000212272	3.67311	225	627	24	19520	HORVU6HR1G037460.6,HORVU6HR1G020400.1,HORVU5HR1G125110.14,HORVU1HR1G094980.1,HORVU1HR1G056020.1,HORVU2HR1G013400.32,HORVU1HR1G069460.1,HORVU3HR1G041160.4,HORVU0HR1G040350.3,HORVU1HR1G088870.2,HORVU7HR1G055930.10,HORVU4HR1G015260.2,HORVU3HR1G074850.25,HORVU2HR1G041270.2,HORVU2HR1G040780.4,HORVU5HR1G109260.1,HORVU5HR1G109360.1,HORVU5HR1G082420.2,HORVU1HR1G079450.2,HORVU3HR1G081270.6,HORVU7HR1G05812…
Down-regulated	GO:BP	response to abiotic stimulus	GO:0009628	0.000461289	3.33603	532	627	40	19520	HORVU7HR1G046290.3,HORVU6HR1G037460.6,HORVU6HR1G020400.1,HORVU5HR1G125110.14,HORVU4HR1G006930.1,HORVU1HR1G094980.1,HORVU1HR1G056020.1,HORVU2HR1G013400.32,HORVU1HR1G069460.1,HORVU3HR1G041160.4,HORVU0HR1G040350.3,HORVU1HR1G088870.2,HORVU7HR1G055930.10,HORVU7HR1G100230.1,HORVU5HR1G103680.1,HORVU5HR1G120650.5,HORVU5HR1G105770.2,HORVU4HR1G015260.2,HORVU3HR1G074850.25,HORVU2HR1G041270.2,HORVU0HR1G01081…
Down-regulated	GO:BP	response to radiation	GO:0009314	0.000594227	3.22605	238	627	24	19520	HORVU6HR1G037460.6,HORVU6HR1G020400.1,HORVU5HR1G125110.14,HORVU1HR1G094980.1,HORVU1HR1G056020.1,HORVU2HR1G013400.32,HORVU1HR1G069460.1,HORVU3HR1G041160.4,HORVU0HR1G040350.3,HORVU1HR1G088870.2,HORVU7HR1G055930.10,HORVU4HR1G015260.2,HORVU3HR1G074850.25,HORVU2HR1G041270.2,HORVU2HR1G040780.4,HORVU5HR1G109260.1,HORVU5HR1G109360.1,HORVU5HR1G082420.2,HORVU1HR1G079450.2,HORVU3HR1G081270.6,HORVU7HR1G05812…
Down-regulated	GO:BP	photosynthesis, light harvesting in photosystem I	GO:0009768	0.0025315	2.59662	30	627	8	19520	HORVU1HR1G088870.2,HORVU4HR1G015260.2,HORVU2HR1G041270.2,HORVU2HR1G040780.4,HORVU5HR1G109260.1,HORVU5HR1G109360.1,HORVU5HR1G082420.2,HORVU7HR1G058120.1
Down-regulated	GO:BP	protein-chromophore linkage	GO:0018298	0.00553807	2.25664	66	627	11	19520	HORVU5HR1G004580.3,HORVU1HR1G088870.2,HORVU2HR1G121790.2,HORVU6HR1G049390.3,HORVU4HR1G015260.2,HORVU2HR1G041270.2,HORVU2HR1G040780.4,HORVU5HR1G109260.1,HORVU5HR1G109360.1,HORVU5HR1G082420.2,HORVU7HR1G058120.1
Down-regulated	GO:BP	generation of precursor metabolites and energy	GO:0006091	0.0302111	1.51983	769	627	46	19520	HORVU5HR1G048120.8,HORVU7HR1G059130.1,HORVU1HR1G090710.12,HORVU2HR1G120230.2,HORVU5HR1G070160.2,HORVU3HR1G013350.1,HORVU3HR1G057240.1,HORVU2HR1G011030.1,HORVU5HR1G004580.3,HORVU1HR1G084520.14,HORVU0HR1G031480.1,HORVU6HR1G049300.1,HORVU1HR1G088870.2,HORVU5HR1G054600.8,HORVU3HR1G021910.3,HORVU7HR1G077740.1,HORVU2HR1G121790.2,HORVU5HR1G082630.5,HORVU7HR1G047000.6,HORVU6HR1G049390.3,HORVU2HR1G057700.…
Down-regulated	GO:BP	photosynthesis, light harvesting	GO:0009765	0.0363367	1.43965	42	627	8	19520	HORVU1HR1G088870.2,HORVU4HR1G015260.2,HORVU2HR1G041270.2,HORVU2HR1G040780.4,HORVU5HR1G109260.1,HORVU5HR1G109360.1,HORVU5HR1G082420.2,HORVU7HR1G058120.1
Down-regulated	GO:BP	small molecule metabolic process	GO:0044281	0.042166	1.37504	1583	627	79	19520	HORVU7HR1G048150.1,HORVU4HR1G041610.1,HORVU3HR1G080530.5,HORVU2HR1G074220.1,HORVU2HR1G015980.1,HORVU7HR1G019830.1,HORVU6HR1G054940.1,HORVU7HR1G055090.3,HORVU1HR1G090710.12,HORVU3HR1G099770.3,HORVU2HR1G070850.2,HORVU5HR1G087990.2,HORVU3HR1G003390.5,HORVU2HR1G001600.1,HORVU5HR1G057950.4,HORVU7HR1G027120.6,HORVU4HR1G076570.6,HORVU2HR1G075010.9,HORVU5HR1G045150.4,HORVU5HR1G012200.1,HORVU1HR1G029480.1…
Down-regulated	GO:CC	plastid	GO:0009536	7.54495e-36	35.1223	1560	653	159	19256	HORVU7HR1G046290.3,HORVU5HR1G007980.1,HORVU3HR1G050440.2,HORVU1HR1G054450.2,HORVU6HR1G020400.1,HORVU5HR1G125110.14,HORVU6HR1G055870.1,HORVU7HR1G019830.1,HORVU5HR1G048120.8,HORVU6HR1G054940.1,HORVU5HR1G030040.1,HORVU7HR1G059130.1,HORVU6HR1G030140.3,HORVU1HR1G010930.3,HORVU2HR1G072590.1,HORVU2HR1G049700.1,HORVU6HR1G064460.1,HORVU7HR1G116640.1,HORVU7HR1G058760.3,HORVU3HR1G098660.3,HORVU2HR1G124210.9…
Down-regulated	GO:CC	chloroplast	GO:0009507	1.18386e-35	34.9267	1531	653	157	19256	HORVU7HR1G046290.3,HORVU5HR1G007980.1,HORVU3HR1G050440.2,HORVU1HR1G054450.2,HORVU6HR1G020400.1,HORVU5HR1G125110.14,HORVU6HR1G055870.1,HORVU7HR1G019830.1,HORVU5HR1G048120.8,HORVU6HR1G054940.1,HORVU5HR1G030040.1,HORVU7HR1G059130.1,HORVU6HR1G030140.3,HORVU1HR1G010930.3,HORVU2HR1G072590.1,HORVU2HR1G049700.1,HORVU6HR1G064460.1,HORVU7HR1G116640.1,HORVU7HR1G058760.3,HORVU3HR1G098660.3,HORVU2HR1G124210.9…
Down-regulated	GO:CC	thylakoid membrane	GO:0042651	2.75166e-16	15.5604	408	653	55	19256	HORVU1HR1G010930.3,HORVU6HR1G064460.1,HORVU0HR1G014170.2,HORVU1HR1G050640.1,HORVU7HR1G091580.1,HORVU5HR1G004580.3,HORVU0HR1G031480.1,HORVU6HR1G049300.1,HORVU0HR1G040350.3,HORVU7HR1G002210.8,HORVU1HR1G088870.2,HORVU4HR1G023580.5,HORVU5HR1G054600.8,HORVU3HR1G000230.5,HORVU2HR1G121790.2,HORVU3HR1G009210.1,HORVU6HR1G049390.3,HORVU2HR1G057700.2,HORVU5HR1G071920.1,HORVU4HR1G015260.2,HORVU2HR1G041270.2,…
Down-regulated	GO:CC	thylakoid	GO:0009579	5.03682e-15	14.2978	602	653	66	19256	HORVU7HR1G046290.3,HORVU1HR1G010930.3,HORVU6HR1G064460.1,HORVU0HR1G014170.2,HORVU1HR1G050640.1,HORVU7HR1G091580.1,HORVU5HR1G004580.3,HORVU4HR1G027260.8,HORVU5HR1G088200.8,HORVU0HR1G031480.1,HORVU6HR1G049300.1,HORVU0HR1G040350.3,HORVU4HR1G010270.2,HORVU7HR1G002210.8,HORVU1HR1G088870.2,HORVU4HR1G023580.5,HORVU5HR1G054600.8,HORVU3HR1G000230.5,HORVU5HR1G097870.1,HORVU2HR1G121790.2,HORVU3HR1G009210.1,…
Down-regulated	GO:CC	plastid thylakoid	GO:0031976	1.63749e-14	13.7858	403	653	52	19256	HORVU7HR1G046290.3,HORVU1HR1G010930.3,HORVU0HR1G014170.2,HORVU1HR1G050640.1,HORVU7HR1G091580.1,HORVU5HR1G004580.3,HORVU0HR1G031480.1,HORVU6HR1G049300.1,HORVU0HR1G040350.3,HORVU7HR1G002210.8,HORVU1HR1G088870.2,HORVU4HR1G023580.5,HORVU5HR1G054600.8,HORVU2HR1G121790.2,HORVU3HR1G009210.1,HORVU3HR1G089650.2,HORVU6HR1G049390.3,HORVU5HR1G071920.1,HORVU4HR1G015260.2,HORVU2HR1G041270.2,HORVU0HR1G034610.1,…
Down-regulated	GO:CC	chloroplast thylakoid	GO:0009534	1.63749e-14	13.7858	403	653	52	19256	HORVU7HR1G046290.3,HORVU1HR1G010930.3,HORVU0HR1G014170.2,HORVU1HR1G050640.1,HORVU7HR1G091580.1,HORVU5HR1G004580.3,HORVU0HR1G031480.1,HORVU6HR1G049300.1,HORVU0HR1G040350.3,HORVU7HR1G002210.8,HORVU1HR1G088870.2,HORVU4HR1G023580.5,HORVU5HR1G054600.8,HORVU2HR1G121790.2,HORVU3HR1G009210.1,HORVU3HR1G089650.2,HORVU6HR1G049390.3,HORVU5HR1G071920.1,HORVU4HR1G015260.2,HORVU2HR1G041270.2,HORVU0HR1G034610.1,…
Down-regulated	GO:CC	photosynthetic membrane	GO:0034357	1.48811e-13	12.8274	500	653	57	19256	HORVU1HR1G010930.3,HORVU6HR1G064460.1,HORVU0HR1G014170.2,HORVU1HR1G050640.1,HORVU7HR1G091580.1,HORVU5HR1G004580.3,HORVU0HR1G031480.1,HORVU6HR1G049300.1,HORVU0HR1G040350.3,HORVU4HR1G010270.2,HORVU7HR1G002210.8,HORVU1HR1G088870.2,HORVU4HR1G023580.5,HORVU5HR1G054600.8,HORVU3HR1G000230.5,HORVU2HR1G121790.2,HORVU3HR1G009210.1,HORVU6HR1G049390.3,HORVU2HR1G057700.2,HORVU5HR1G071920.1,HORVU4HR1G015260.2,…
Down-regulated	GO:CC	chloroplast thylakoid membrane	GO:0009535	6.25048e-13	12.2041	366	653	47	19256	HORVU1HR1G010930.3,HORVU0HR1G014170.2,HORVU1HR1G050640.1,HORVU7HR1G091580.1,HORVU5HR1G004580.3,HORVU0HR1G031480.1,HORVU6HR1G049300.1,HORVU0HR1G040350.3,HORVU7HR1G002210.8,HORVU1HR1G088870.2,HORVU4HR1G023580.5,HORVU5HR1G054600.8,HORVU2HR1G121790.2,HORVU3HR1G009210.1,HORVU6HR1G049390.3,HORVU5HR1G071920.1,HORVU4HR1G015260.2,HORVU2HR1G041270.2,HORVU0HR1G034610.1,HORVU0HR1G037590.1,HORVU6HR1G049160.1,…
Down-regulated	GO:CC	plastid thylakoid membrane	GO:0055035	6.25048e-13	12.2041	366	653	47	19256	HORVU1HR1G010930.3,HORVU0HR1G014170.2,HORVU1HR1G050640.1,HORVU7HR1G091580.1,HORVU5HR1G004580.3,HORVU0HR1G031480.1,HORVU6HR1G049300.1,HORVU0HR1G040350.3,HORVU7HR1G002210.8,HORVU1HR1G088870.2,HORVU4HR1G023580.5,HORVU5HR1G054600.8,HORVU2HR1G121790.2,HORVU3HR1G009210.1,HORVU6HR1G049390.3,HORVU5HR1G071920.1,HORVU4HR1G015260.2,HORVU2HR1G041270.2,HORVU0HR1G034610.1,HORVU0HR1G037590.1,HORVU6HR1G049160.1,…
Down-regulated	GO:CC	plastid stroma	GO:0009532	1.24141e-10	9.90608	288	653	38	19256	HORVU7HR1G046290.3,HORVU5HR1G048120.8,HORVU6HR1G054940.1,HORVU7HR1G058760.3,HORVU5HR1G033180.3,HORVU0HR1G016930.9,HORVU2HR1G114720.4,HORVU1HR1G050640.1,HORVU6HR1G065960.2,HORVU3HR1G041160.4,HORVU3HR1G063280.6,HORVU4HR1G027260.8,HORVU1HR1G050900.7,HORVU7HR1G060530.12,HORVU1HR1G088870.2,HORVU4HR1G023580.5,HORVU7HR1G008070.6,HORVU7HR1G082590.1,HORVU0HR1G026700.1,HORVU6HR1G068720.4,HORVU4HR1G063600.5…
Down-regulated	GO:CC	chloroplast stroma	GO:0009570	1.91836e-10	9.71707	278	653	37	19256	HORVU7HR1G046290.3,HORVU5HR1G048120.8,HORVU6HR1G054940.1,HORVU7HR1G058760.3,HORVU5HR1G033180.3,HORVU0HR1G016930.9,HORVU2HR1G114720.4,HORVU1HR1G050640.1,HORVU6HR1G065960.2,HORVU3HR1G041160.4,HORVU3HR1G063280.6,HORVU4HR1G027260.8,HORVU1HR1G050900.7,HORVU7HR1G060530.12,HORVU1HR1G088870.2,HORVU4HR1G023580.5,HORVU7HR1G008070.6,HORVU7HR1G082590.1,HORVU0HR1G026700.1,HORVU6HR1G068720.4,HORVU4HR1G063600.5…
Down-regulated	GO:CC	organelle subcompartment	GO:0031984	5.97297e-10	9.22381	590	653	56	19256	HORVU7HR1G046290.3,HORVU1HR1G010930.3,HORVU0HR1G014170.2,HORVU1HR1G050640.1,HORVU7HR1G091580.1,HORVU5HR1G004580.3,HORVU0HR1G031480.1,HORVU6HR1G049300.1,HORVU0HR1G040350.3,HORVU7HR1G002210.8,HORVU1HR1G088870.2,HORVU4HR1G023580.5,HORVU5HR1G046490.15,HORVU5HR1G054600.8,HORVU2HR1G121790.2,HORVU3HR1G009210.1,HORVU3HR1G089650.2,HORVU6HR1G049390.3,HORVU5HR1G071920.1,HORVU4HR1G015260.2,HORVU2HR1G041270.2…
Down-regulated	GO:CC	plastid envelope	GO:0009526	9.30143e-08	7.03145	237	653	30	19256	HORVU3HR1G050440.2,HORVU6HR1G055870.1,HORVU6HR1G054940.1,HORVU5HR1G030040.1,HORVU4HR1G020770.3,HORVU5HR1G067910.3,HORVU1HR1G090990.19,HORVU2HR1G114720.4,HORVU3HR1G089880.8,HORVU1HR1G062340.4,HORVU6HR1G047770.4,HORVU3HR1G041160.4,HORVU3HR1G063280.6,HORVU0HR1G040350.3,HORVU0HR1G008790.3,HORVU7HR1G060530.12,HORVU1HR1G088870.2,HORVU7HR1G082590.1,HORVU0HR1G021760.3,HORVU5HR1G122820.4,HORVU5HR1G082630.…
Down-regulated	GO:CC	chloroplast envelope	GO:0009941	2.6867e-07	6.57078	233	653	29	19256	HORVU3HR1G050440.2,HORVU6HR1G055870.1,HORVU6HR1G054940.1,HORVU5HR1G030040.1,HORVU4HR1G020770.3,HORVU5HR1G067910.3,HORVU1HR1G090990.19,HORVU2HR1G114720.4,HORVU3HR1G089880.8,HORVU6HR1G047770.4,HORVU3HR1G041160.4,HORVU3HR1G063280.6,HORVU0HR1G040350.3,HORVU0HR1G008790.3,HORVU7HR1G060530.12,HORVU1HR1G088870.2,HORVU7HR1G082590.1,HORVU0HR1G021760.3,HORVU5HR1G122820.4,HORVU5HR1G082630.5,HORVU2HR1G041270.…
Down-regulated	GO:CC	plastoglobule	GO:0010287	1.12165e-06	5.95014	41	653	12	19256	HORVU0HR1G016930.9,HORVU1HR1G050640.1,HORVU1HR1G088870.2,HORVU6HR1G068720.4,HORVU4HR1G015260.2,HORVU2HR1G115690.4,HORVU2HR1G041270.2,HORVU2HR1G040780.4,HORVU5HR1G109260.1,HORVU5HR1G109360.1,HORVU5HR1G082420.2,HORVU7HR1G058120.1
Down-regulated	GO:CC	cytoplasm	GO:0005737	1.92194e-05	4.71626	7077	653	304	19256	HORVU1HR1G072490.2,HORVU1HR1G025390.3,HORVU7HR1G048150.1,HORVU7HR1G046290.3,HORVU4HR1G041610.1,HORVU5HR1G007980.1,HORVU3HR1G050440.2,HORVU1HR1G083800.3,HORVU5HR1G037540.3,HORVU2HR1G035400.1,HORVU3HR1G080530.5,HORVU1HR1G054450.2,HORVU6HR1G020400.1,HORVU2HR1G074220.1,HORVU5HR1G125110.14,HORVU6HR1G055870.1,HORVU7HR1G019830.1,HORVU7HR1G045980.2,HORVU4HR1G086820.9,HORVU6HR1G017900.14,HORVU7HR1G097010.…
Down-regulated	GO:CC	photosystem I	GO:0009522	0.000538932	3.26847	107	653	15	19256	HORVU4HR1G010270.2,HORVU1HR1G088870.2,HORVU3HR1G009210.1,HORVU5HR1G071920.1,HORVU4HR1G015260.2,HORVU2HR1G041270.2,HORVU5HR1G113900.2,HORVU2HR1G060480.1,HORVU5HR1G109710.1,HORVU2HR1G040780.4,HORVU5HR1G109260.1,HORVU5HR1G109360.1,HORVU5HR1G082420.2,HORVU0HR1G034550.1,HORVU7HR1G058120.1
Down-regulated	GO:CC	photosystem	GO:0009521	0.00129967	2.88617	257	653	24	19256	HORVU5HR1G004580.3,HORVU4HR1G010270.2,HORVU1HR1G088870.2,HORVU2HR1G121790.2,HORVU3HR1G009210.1,HORVU6HR1G049390.3,HORVU2HR1G057700.2,HORVU5HR1G071920.1,HORVU4HR1G015260.2,HORVU2HR1G041270.2,HORVU0HR1G003270.1,HORVU7HR1G051160.7,HORVU5HR1G113900.2,HORVU2HR1G060480.1,HORVU6HR1G085170.1,HORVU5HR1G109710.1,HORVU2HR1G040780.4,HORVU3HR1G078820.1,HORVU5HR1G109260.1,HORVU5HR1G109360.1,HORVU5HR1G082420.2,…
Down-regulated	GO:CC	photosystem II	GO:0009523	0.0107142	1.97004	169	653	17	19256	HORVU5HR1G004580.3,HORVU1HR1G088870.2,HORVU2HR1G121790.2,HORVU6HR1G049390.3,HORVU2HR1G057700.2,HORVU4HR1G015260.2,HORVU2HR1G041270.2,HORVU0HR1G003270.1,HORVU7HR1G051160.7,HORVU6HR1G085170.1,HORVU2HR1G040780.4,HORVU3HR1G078820.1,HORVU5HR1G109260.1,HORVU5HR1G109360.1,HORVU5HR1G082420.2,HORVU6HR1G051650.2,HORVU7HR1G058120.1
Down-regulated	GO:CC	photosystem II oxygen evolving complex	GO:0009654	0.0116497	1.93368	22	653	6	19256	HORVU2HR1G057700.2,HORVU0HR1G003270.1,HORVU7HR1G051160.7,HORVU6HR1G085170.1,HORVU3HR1G078820.1,HORVU6HR1G051650.2
Down-regulated	GO:CC	plastid membrane	GO:0042170	0.0131568	1.88085	94	653	12	19256	HORVU3HR1G050440.2,HORVU6HR1G055870.1,HORVU5HR1G030040.1,HORVU4HR1G020770.3,HORVU5HR1G067910.3,HORVU1HR1G090990.19,HORVU6HR1G047770.4,HORVU0HR1G008790.3,HORVU0HR1G021760.3,HORVU5HR1G122820.4,HORVU1HR1G063220.2,HORVU5HR1G063590.1
Down-regulated	GO:CC	chloroplast membrane	GO:0031969	0.0131568	1.88085	94	653	12	19256	HORVU3HR1G050440.2,HORVU6HR1G055870.1,HORVU5HR1G030040.1,HORVU4HR1G020770.3,HORVU5HR1G067910.3,HORVU1HR1G090990.19,HORVU6HR1G047770.4,HORVU0HR1G008790.3,HORVU0HR1G021760.3,HORVU5HR1G122820.4,HORVU1HR1G063220.2,HORVU5HR1G063590.1
Down-regulated	GO:CC	intracellular membrane-bounded organelle	GO:0043231	0.0360092	1.44359	9033	653	351	19256	HORVU1HR1G072490.2,HORVU1HR1G025390.3,HORVU7HR1G048150.1,HORVU7HR1G046290.3,HORVU4HR1G041610.1,HORVU7HR1G107550.5,HORVU5HR1G063000.9,HORVU5HR1G007980.1,HORVU3HR1G050440.2,HORVU5HR1G037540.3,HORVU3HR1G051190.6,HORVU7HR1G074520.1,HORVU1HR1G054450.2,HORVU6HR1G020400.1,HORVU2HR1G045140.1,HORVU5HR1G125110.14,HORVU6HR1G055870.1,HORVU7HR1G019830.1,HORVU4HR1G086820.9,HORVU6HR1G017900.14,HORVU7HR1G097010.…

[truncated: 7 more sheets: Table S11, Table S12, Table S13, Table S14, Table S15, Table S16, Table S17]
